# Supplementary material for: Synthesis of 7α-Methoxy-7-(4-phenyl-1H-1,2,3-triazol-1-yl)acetamino-3′-arylthio-cephalosporic Acid Derivatives from 7-Aminocephalosporic Acid
Source: MDPI journal article supplement (doi:10.3390/molecules28217338), 2023-10-30
Supplement: s1 [file s1]

## Supporting Information

### Synthesis of 7 $\alpha$ -methoxy-7-(4-phenyl-1*H*-1,2,3-triazol-1-yl)acetamino-3'-arylthio-cephalosporic acid derivatives from 7-aminocephalosporic acid

Wendy Y. Cun, Paul A. Keller and Stephen G. Pyne \*

School of Chemistry and Molecular Bioscience, Molecular Horizons Research Institute,  
University of Wollongong, Wollongong, NSW 2522, Australia;

ywc538@uowmail.edu.au (W.Y.C.); keller@uow.edu.au (P.A.K.)

\* Correspondence: spyne@uow.edu.au

Copies of  $^1\text{H}$  and  $^{13}\text{C}$  NMR spectra

Pages 2-21

Copies of HPLC traces for **21a–21h**

Pages 22-29

## <sup>1</sup>H and <sup>13</sup>C NMR Spectra

Compound **12** (<sup>1</sup>H NMR [500 MHz] spectrum, CD<sub>3</sub>COCD<sub>3</sub>)

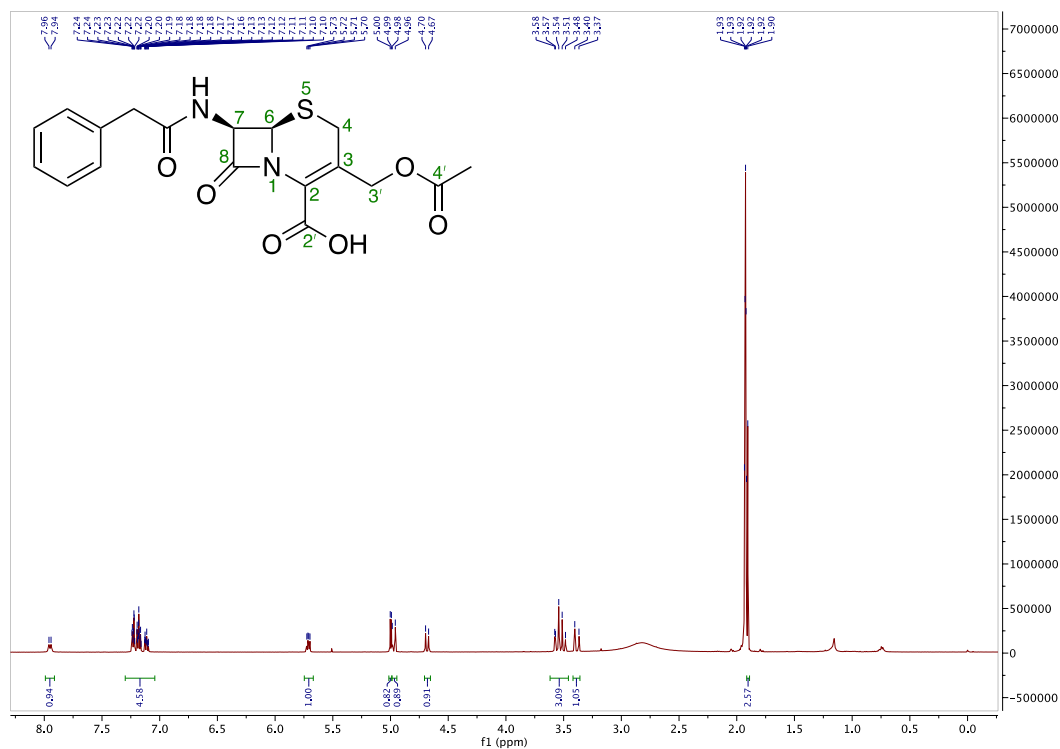Benzhydryl 2,2,2-trichloroacetimidate (<sup>1</sup>H NMR [500 MHz] spectrum, CDCl<sub>3</sub>)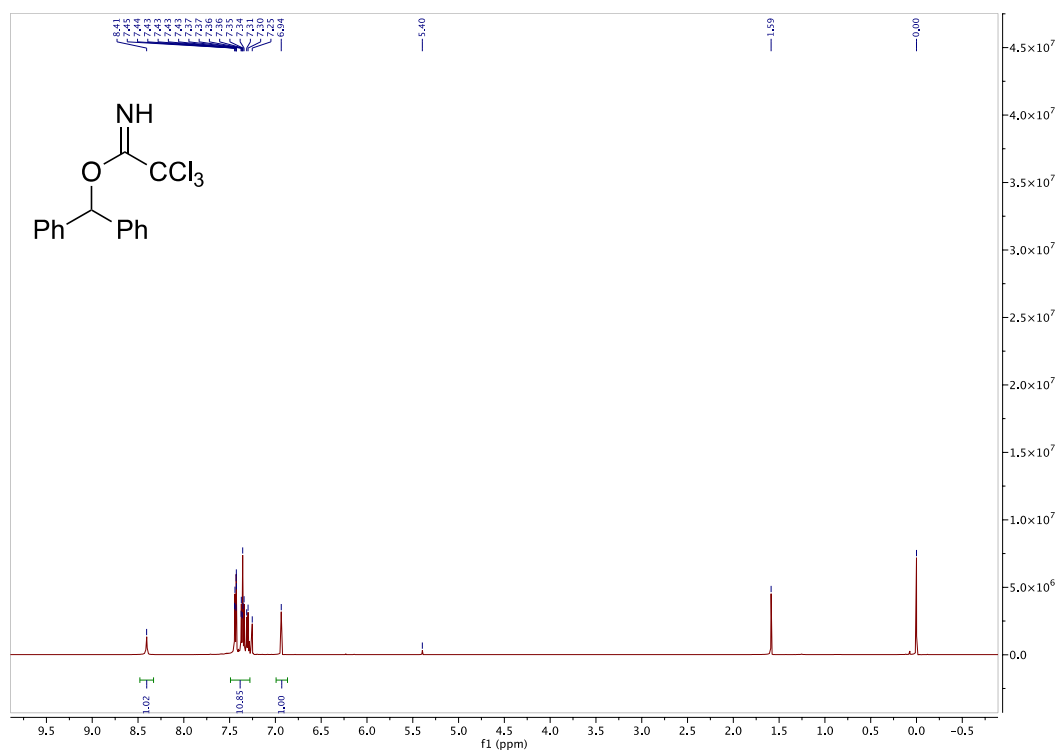

Compound **13** (<sup>1</sup>H NMR [500 MHz] spectrum, CDCl<sub>3</sub>)

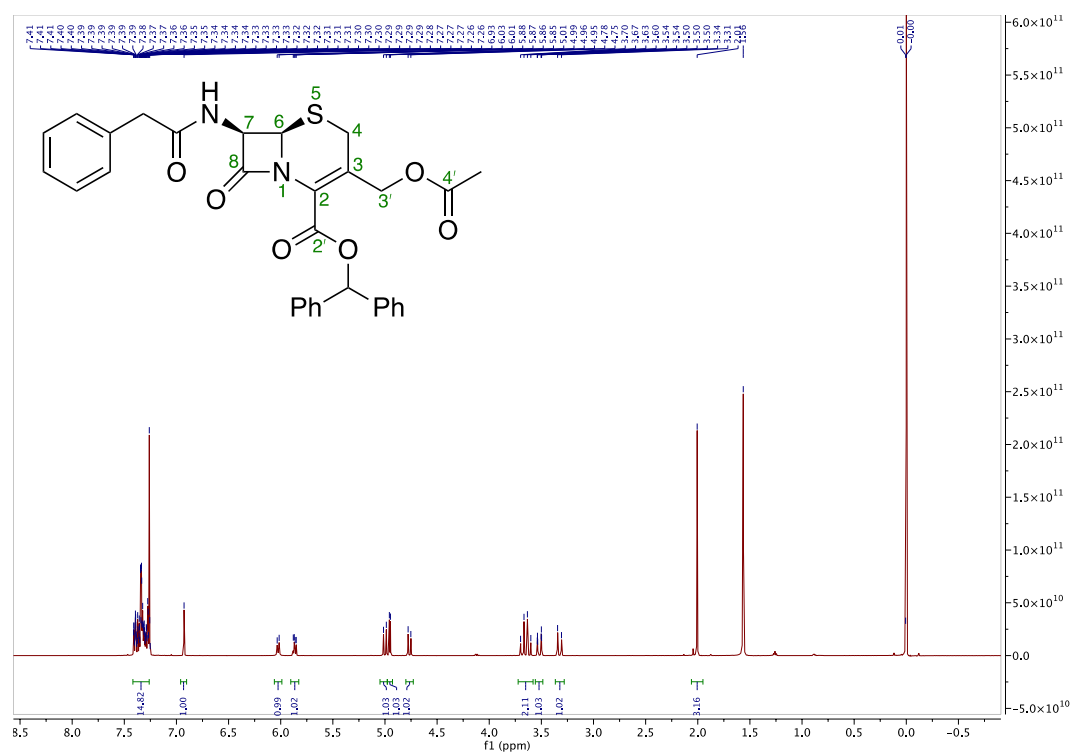

Compound **14** (yellow) (<sup>1</sup>H NMR [500 MHz] spectrum, CD<sub>3</sub>SOCD<sub>3</sub>)

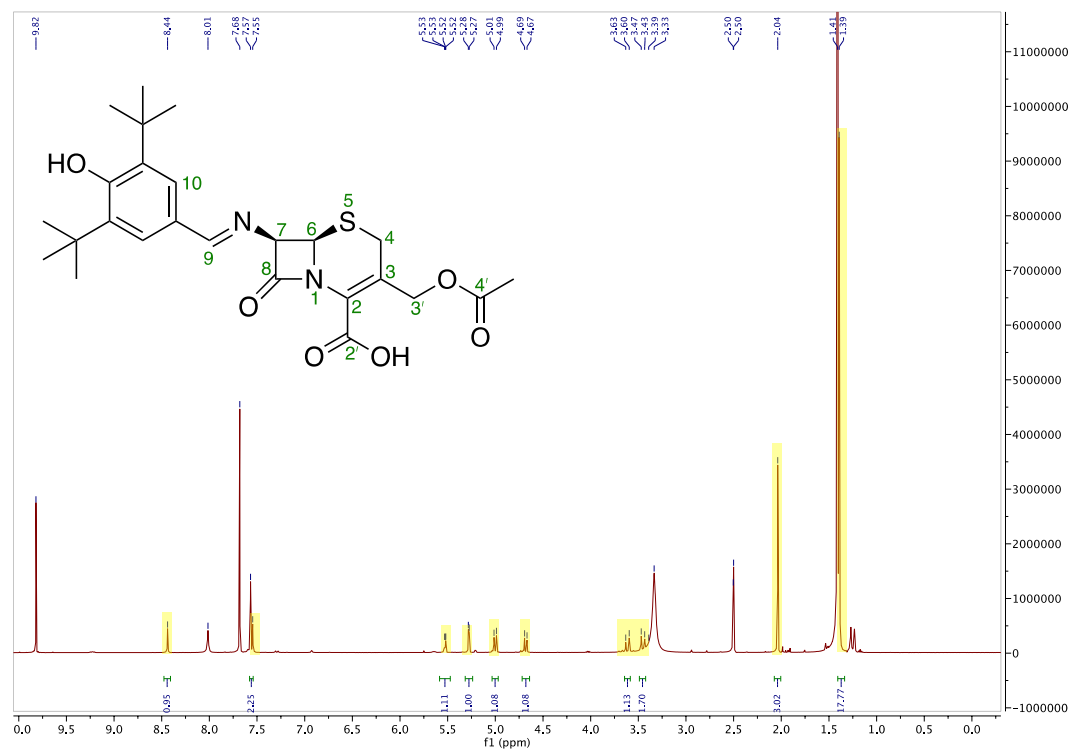

Compound **15a** (yellow) ( $^1\text{H}$  NMR [500 MHz] spectrum,  $\text{CD}_3\text{OD}$ )

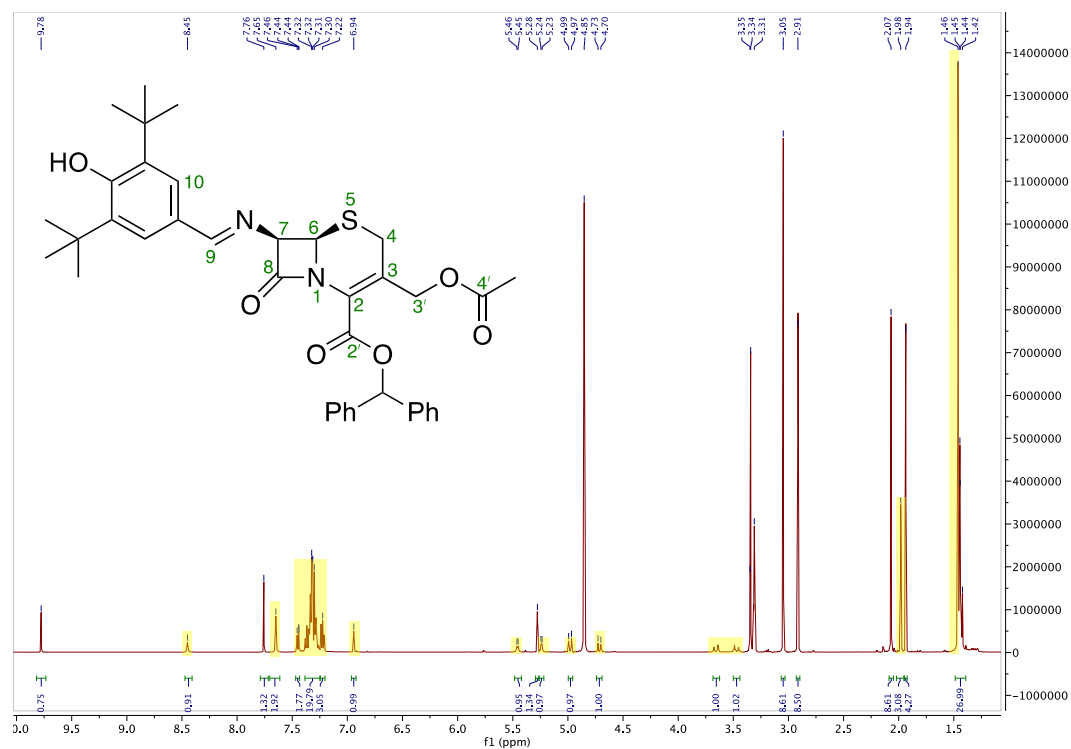

Compound **16a** ( $^1\text{H}$  NMR [500 MHz] spectrum,  $\text{CDCl}_3$ )

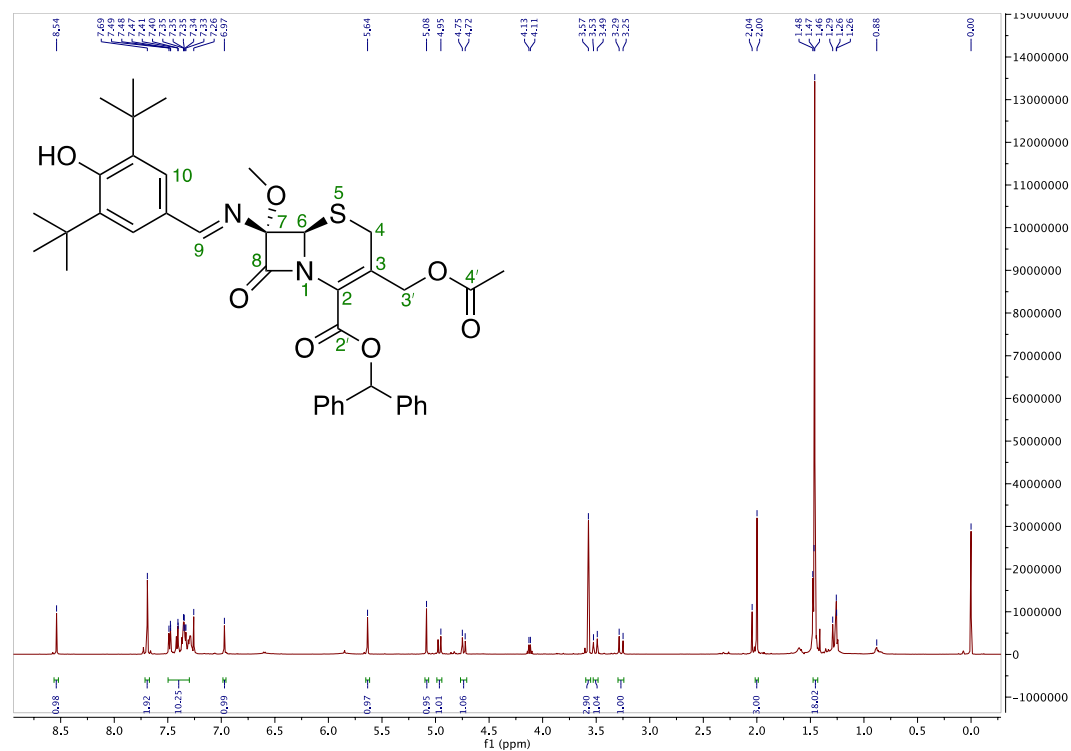

Compound **7** (yellow) in mixture with by-product (pink) ( $^1\text{H}$  NMR [500 MHz] spectrum,  $\text{CDCl}_3$ )

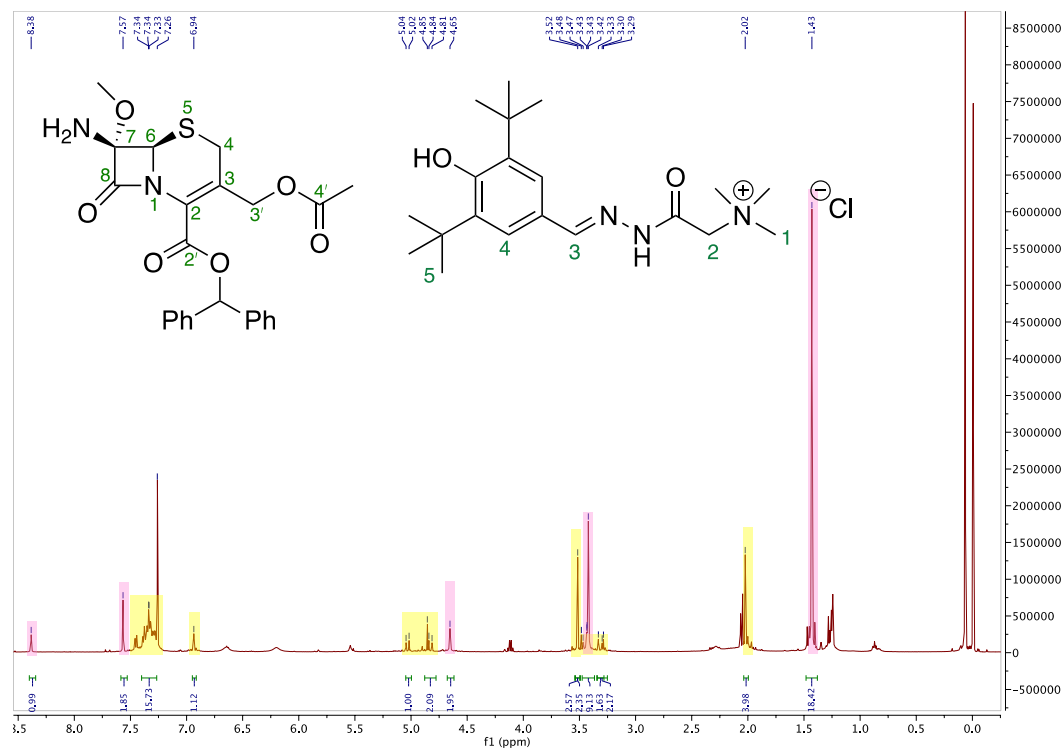

Compound **8** ( $^1\text{H}$  NMR [500 MHz] and DEPT [126 Hz] spectra  $\text{CDCl}_3$ )

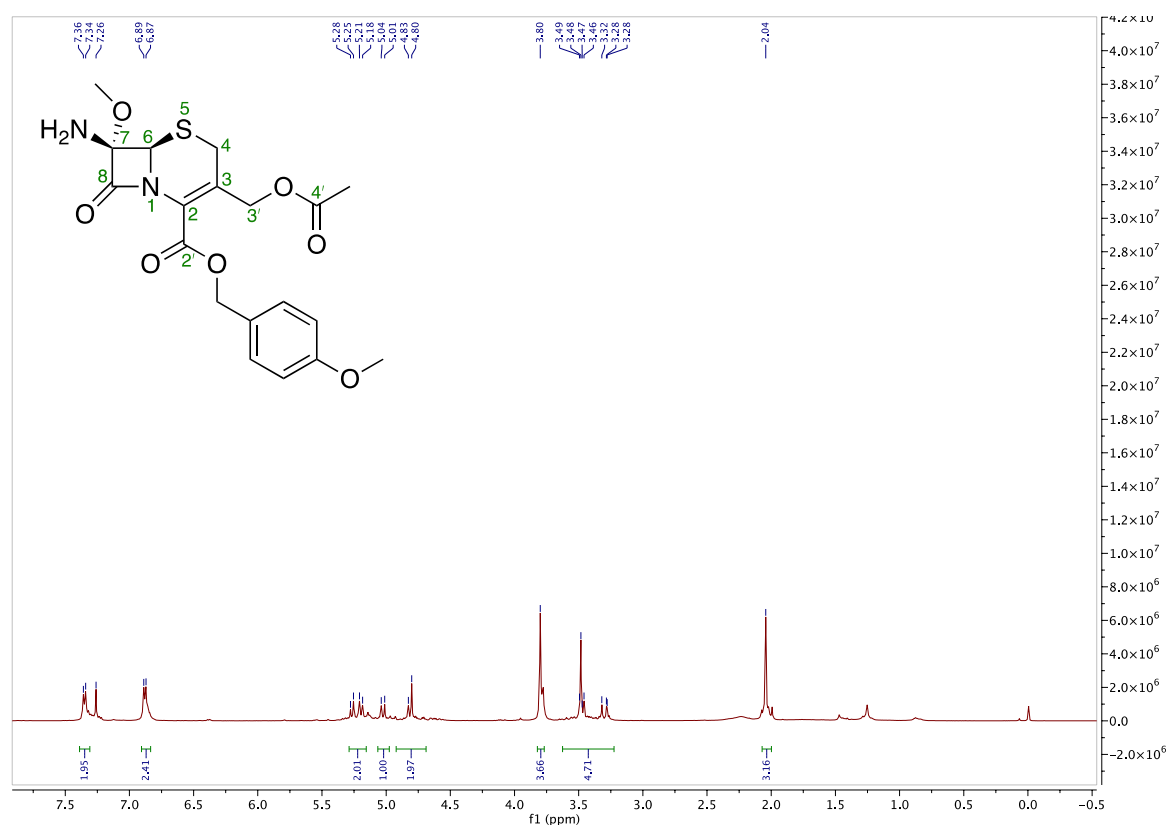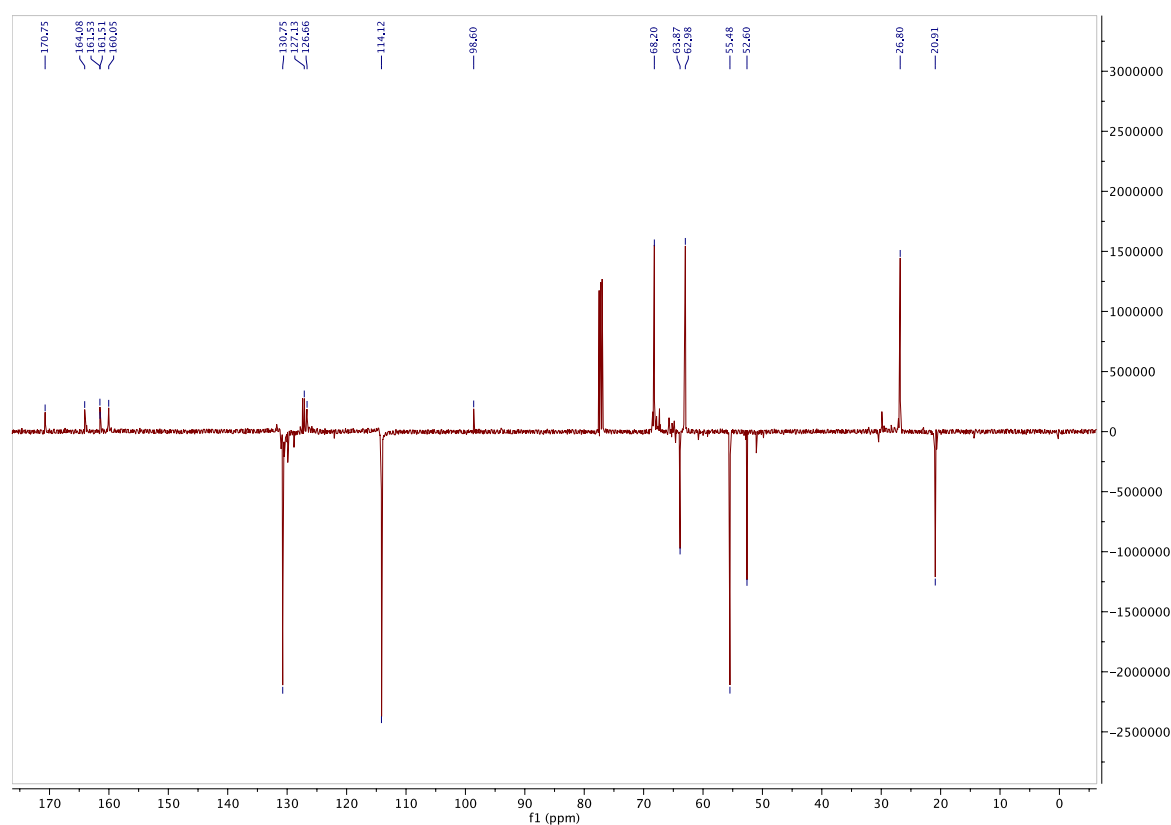

Compound **17a** ( $^1\text{H}$  NMR [400 MHz] and DEPT [101 Hz] spectra  $\text{CDCl}_3$ )

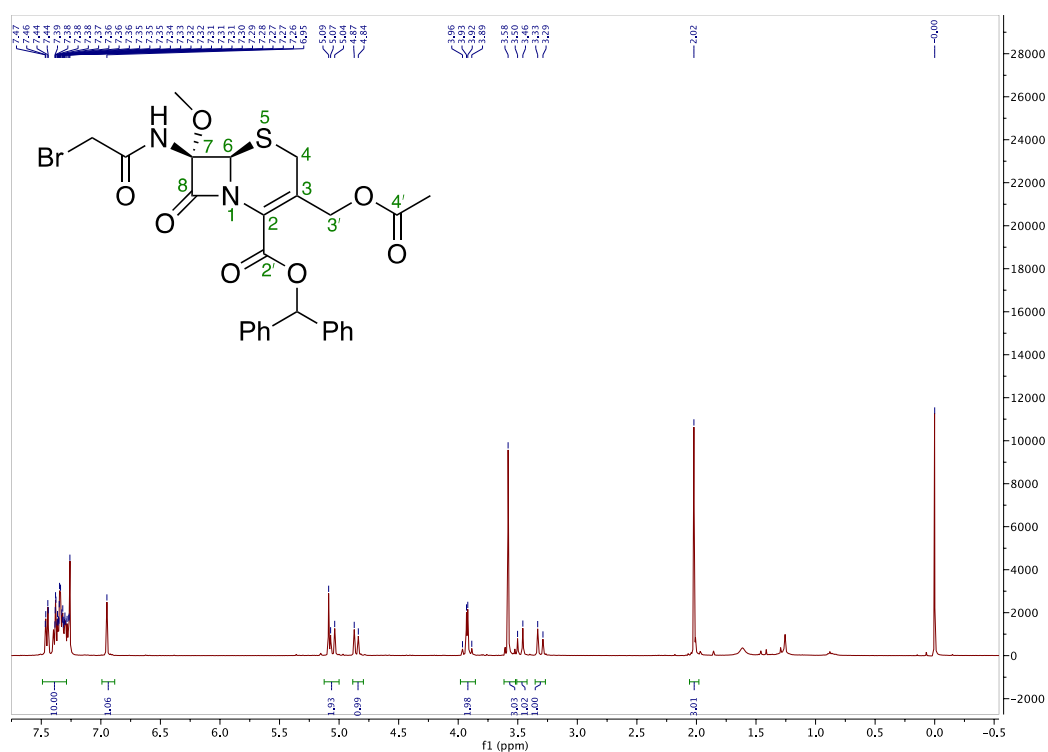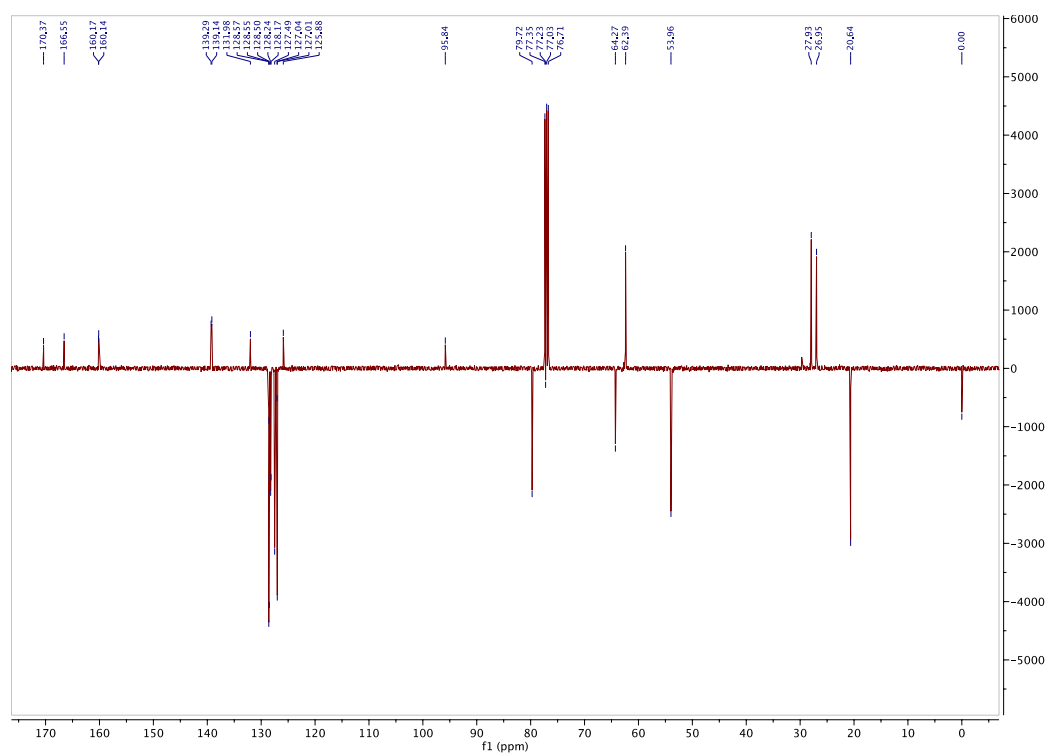

Compound **15b** (yellow) ( $^1\text{H}$  NMR [500 MHz] spectrum,  $\text{CD}_3\text{OD}$ )

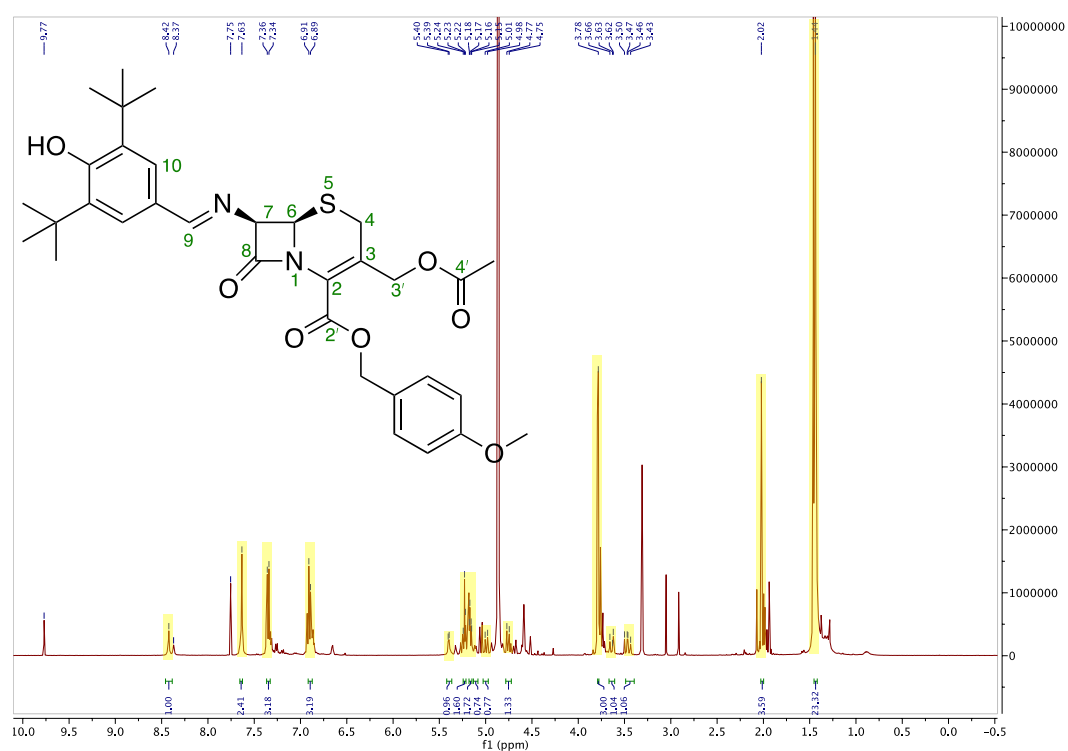



Compound **16b** ( $^1\text{H}$  NMR [400 MHz] and DEPT [101 Hz] spectra  $\text{CDCl}_3$ )

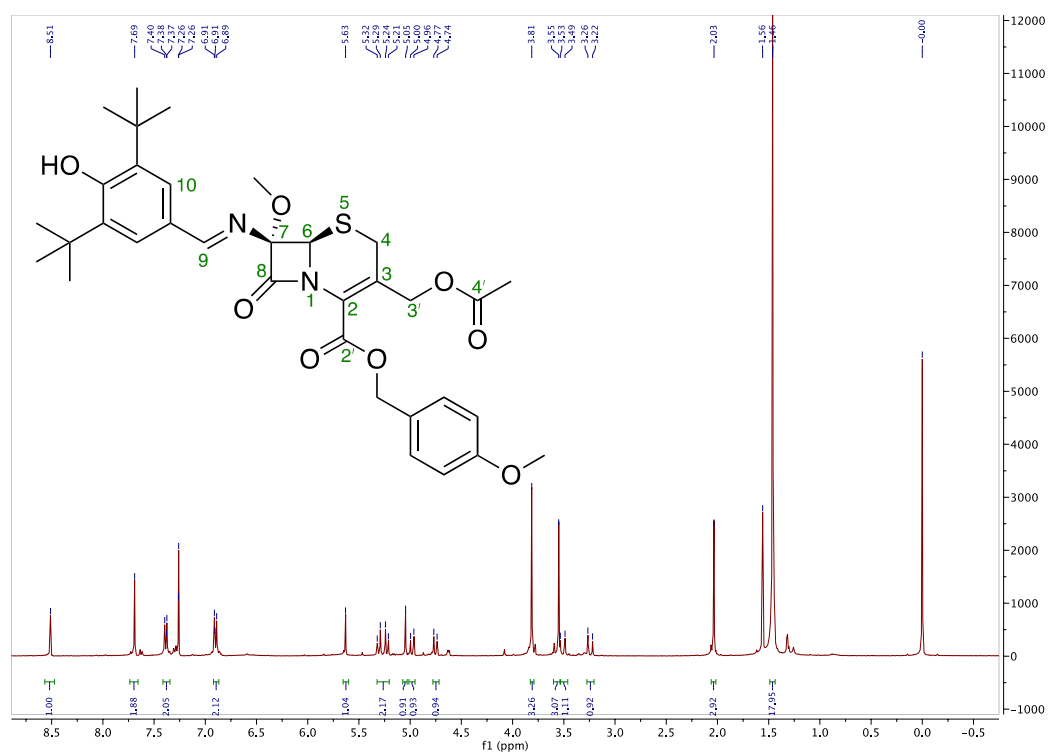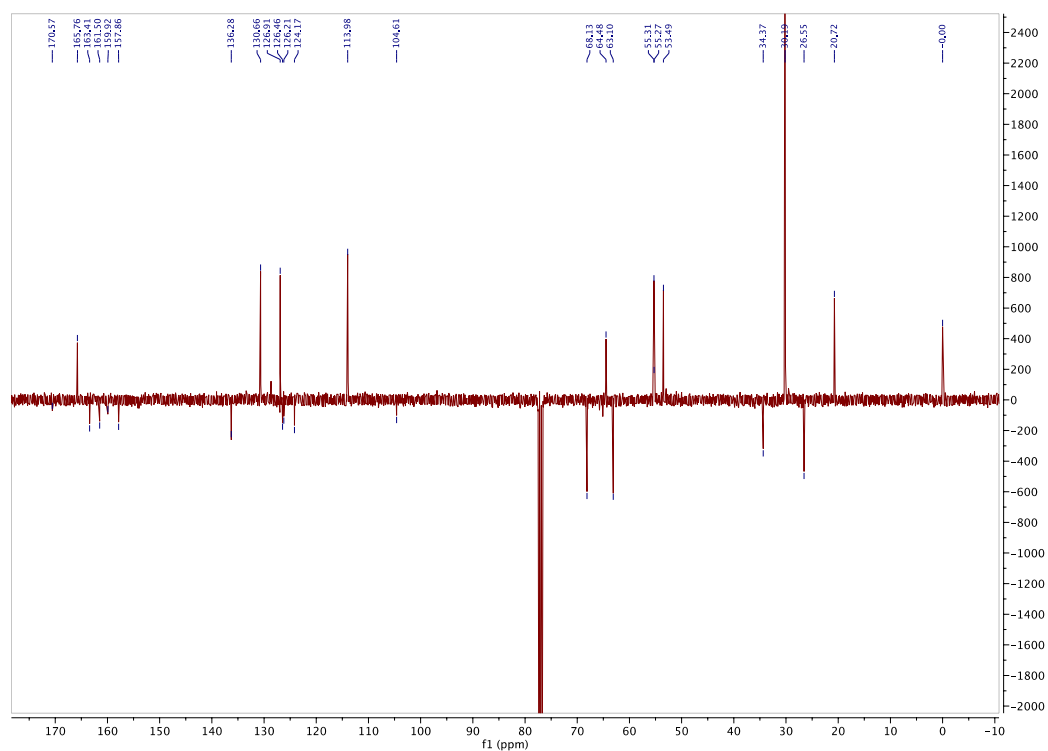

Compound **17b** ( $^1\text{H}$  NMR [400 MHz] and DEPT [101 Hz] spectra  $\text{CDCl}_3$ )

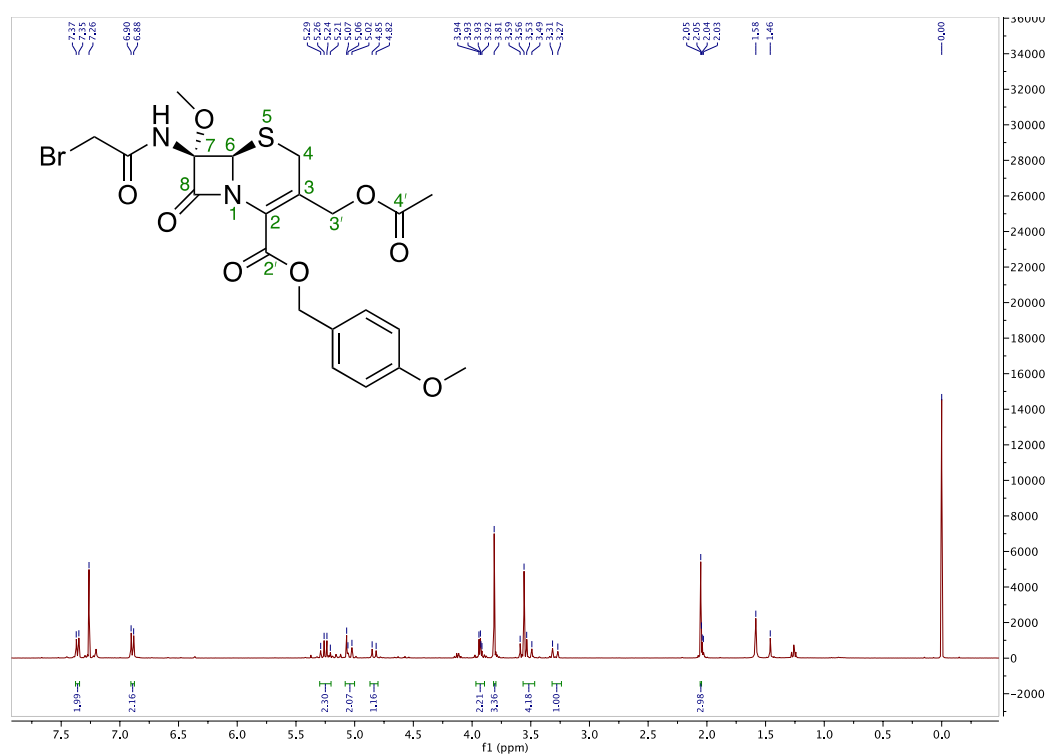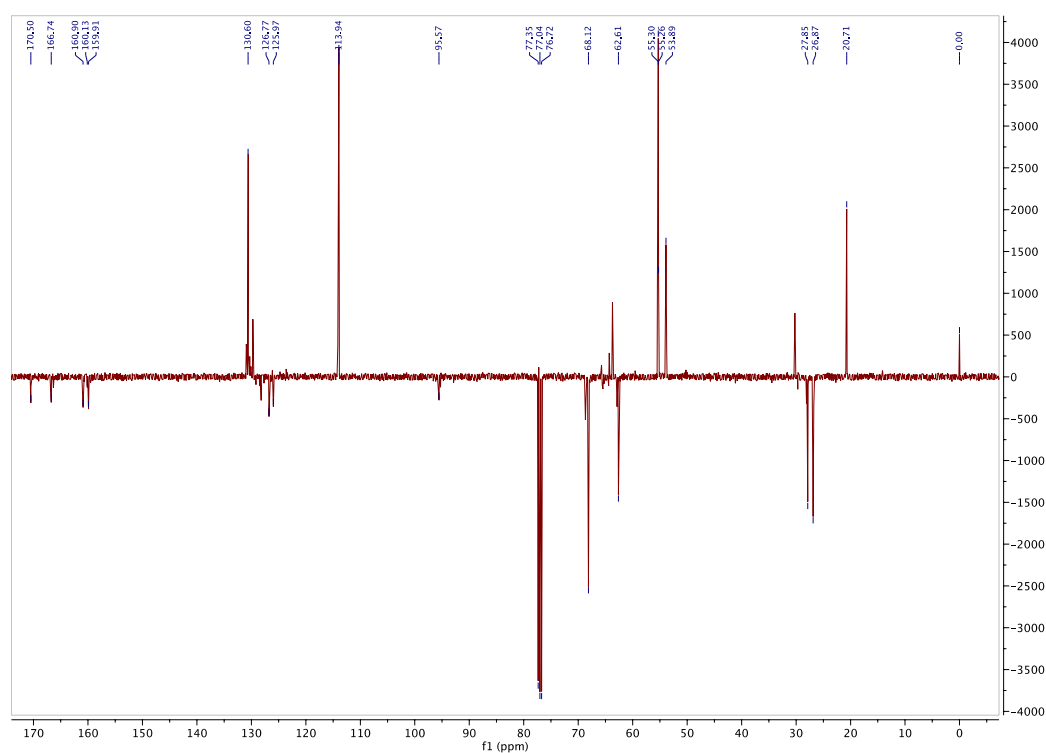

Compound **18** ( $^1\text{H}$  NMR [400 MHz] and DEPT [101 Hz] spectra  $\text{CD}_3\text{CN}$ )

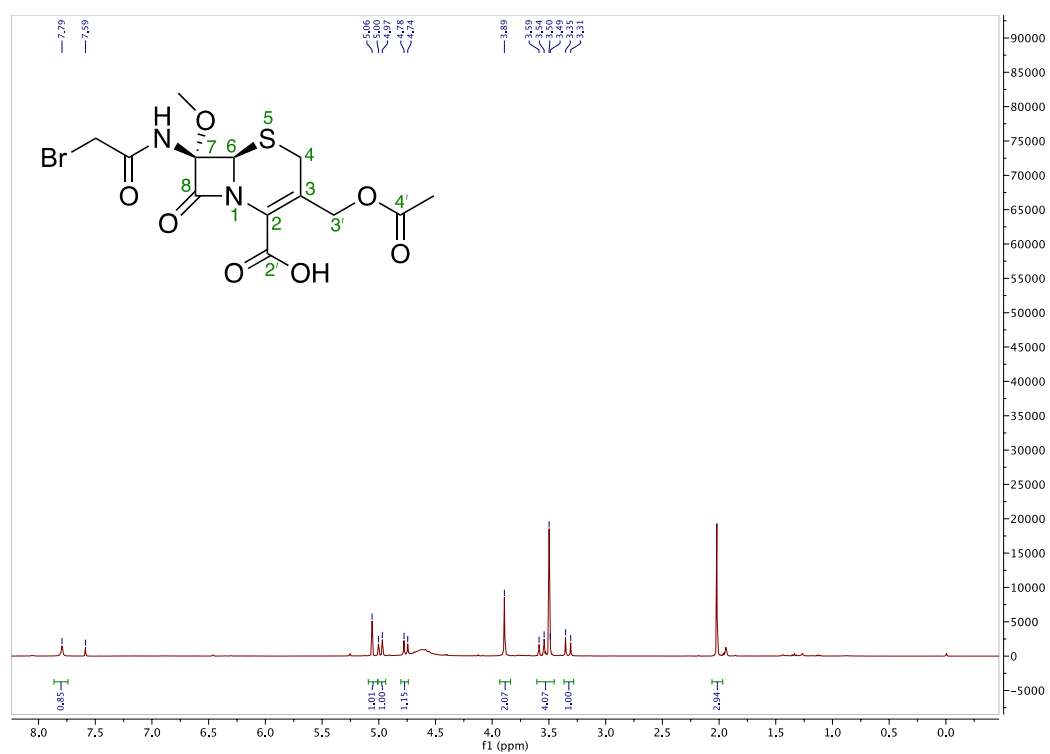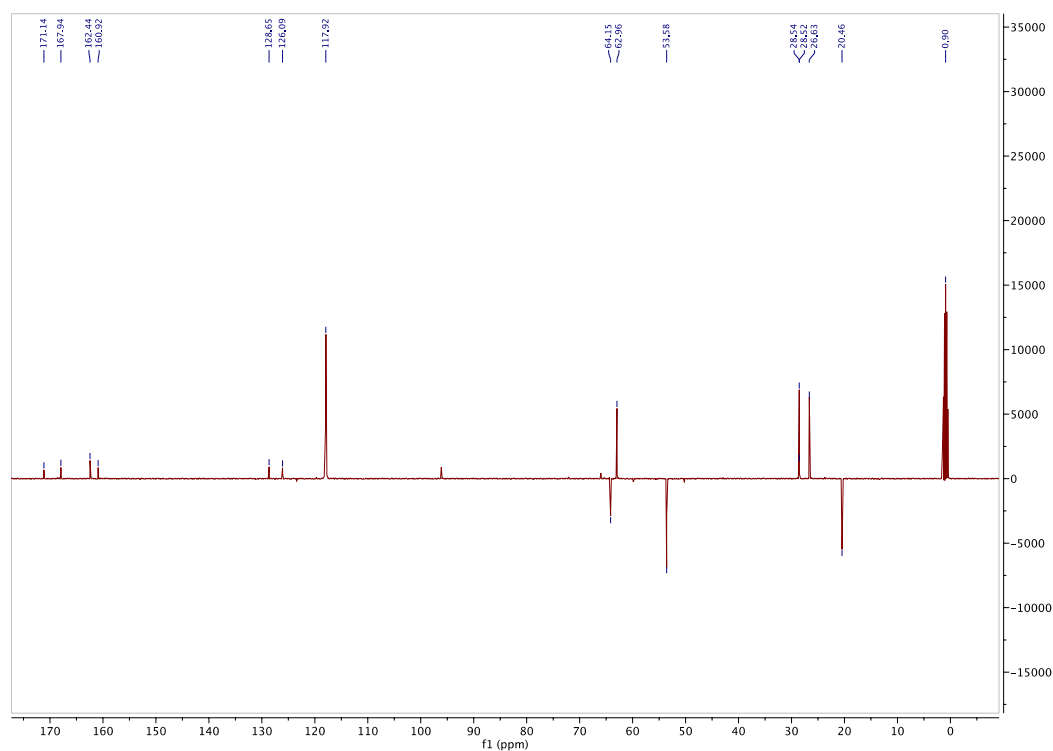

Compound **19** ( $^1\text{H}$  NMR [400 MHz] and DEPT [101 Hz] spectra  $\text{CD}_3\text{CN}$ )

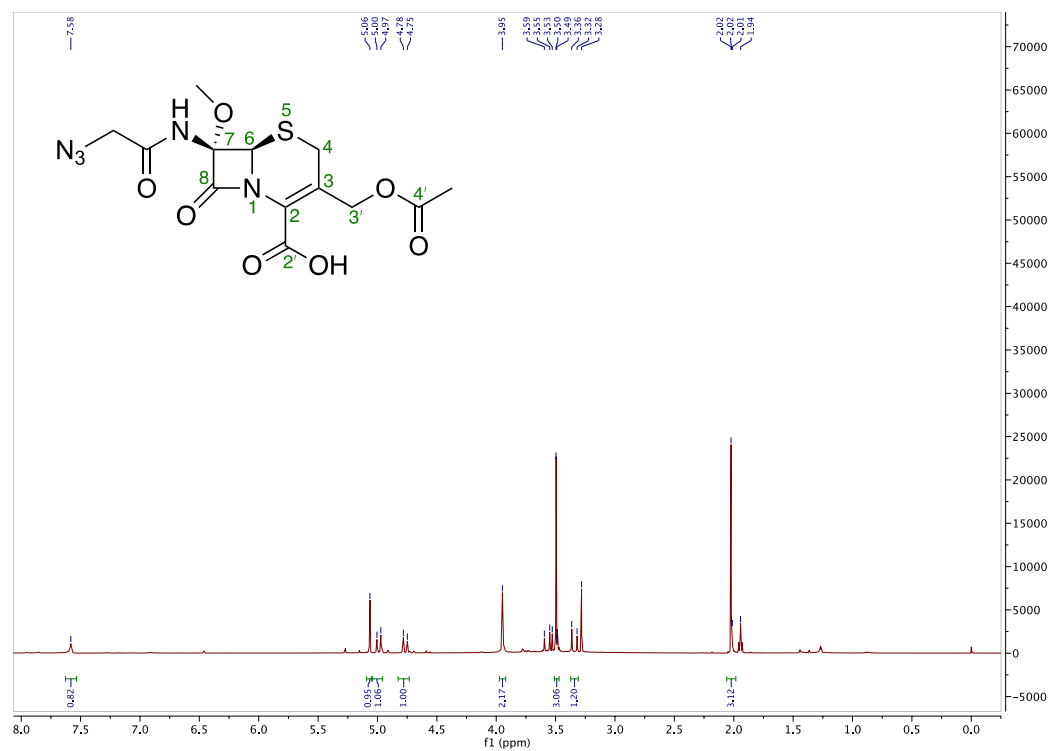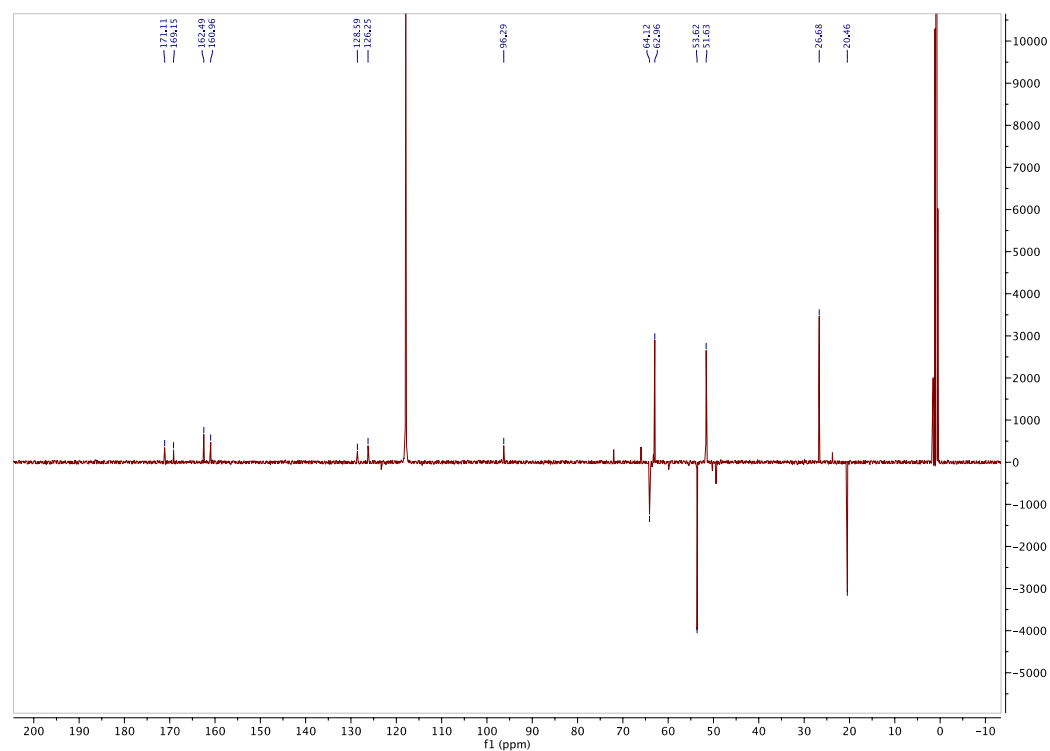

Compound **20** ( $^1\text{H}$  NMR [400 MHz] and DEPT [101 Hz] spectra  $\text{CD}_3\text{CN}$ )

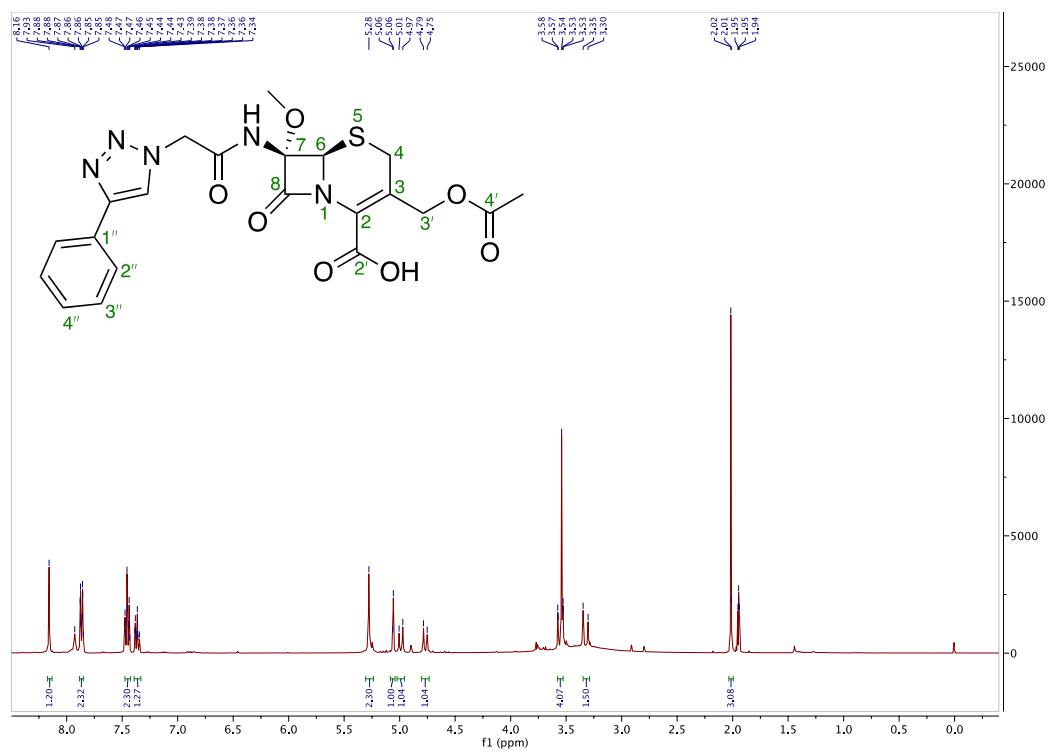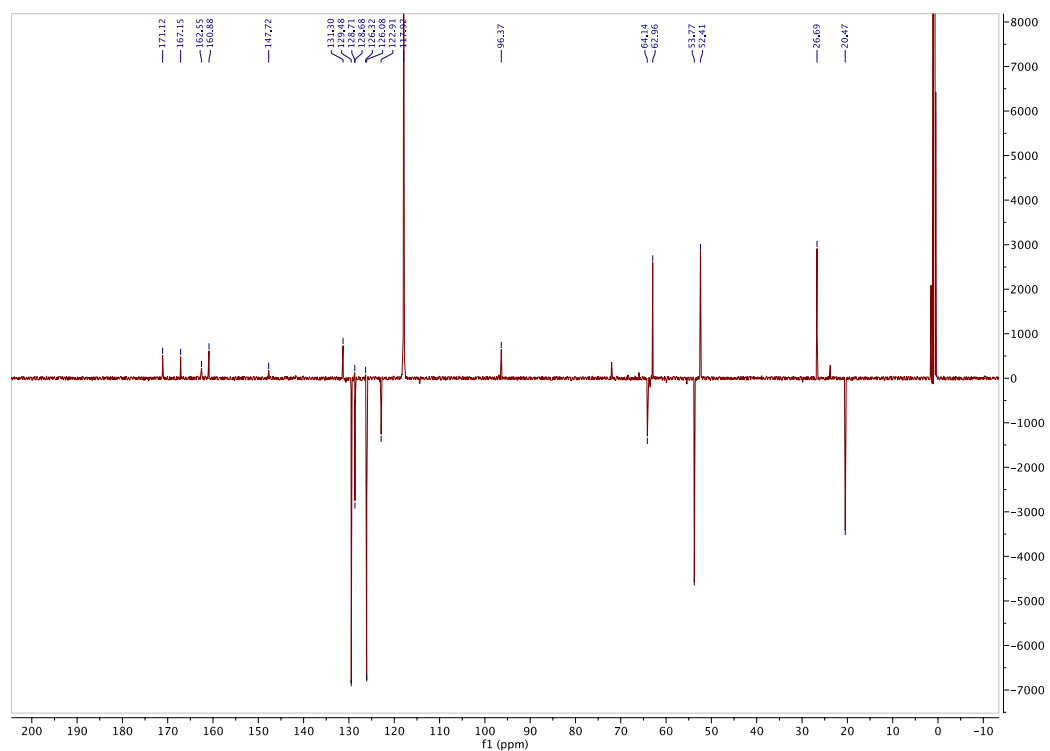

Compound **21a** ( $^1\text{H}$  NMR [400 MHz] and DEPT [101 Hz] spectra,  $\text{CD}_3\text{CN}$ )

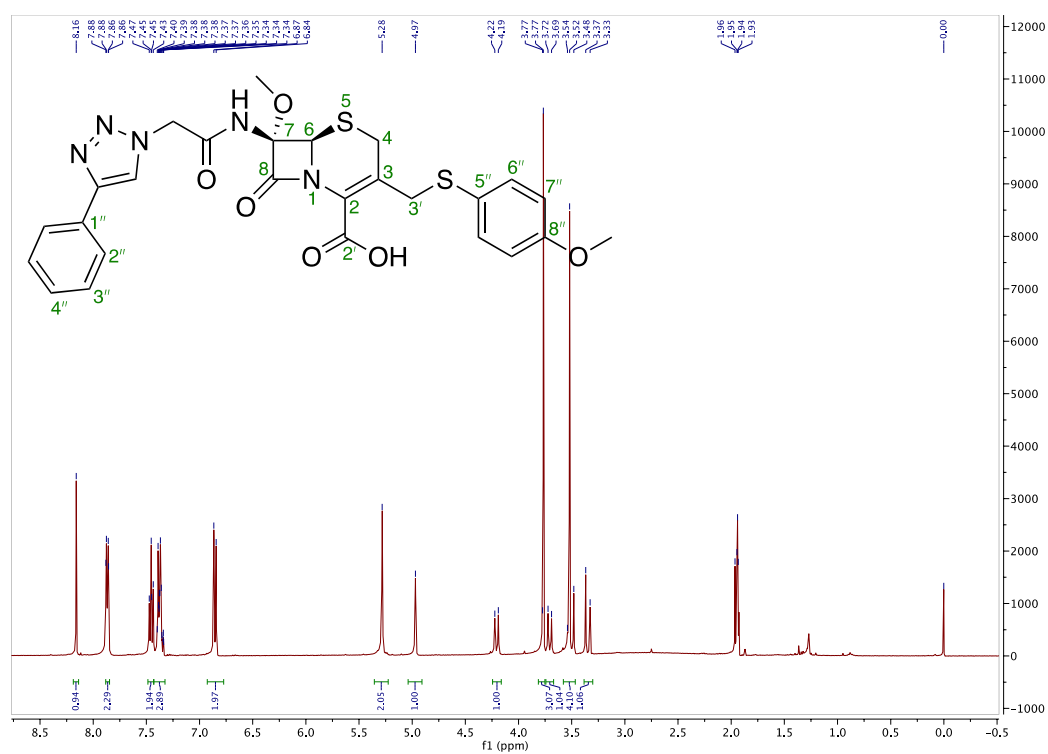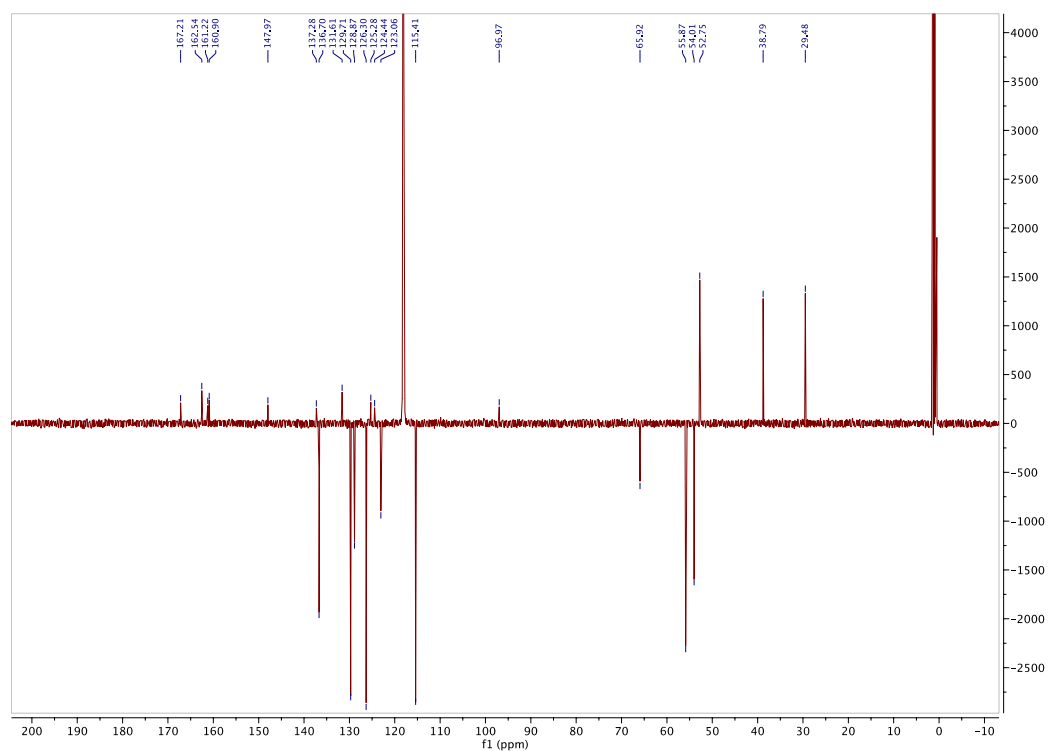

Compound **21b** ( $^1\text{H}$  NMR [400 MHz] and DEPT [101 Hz] spectra,  $\text{CD}_3\text{CN}$ )

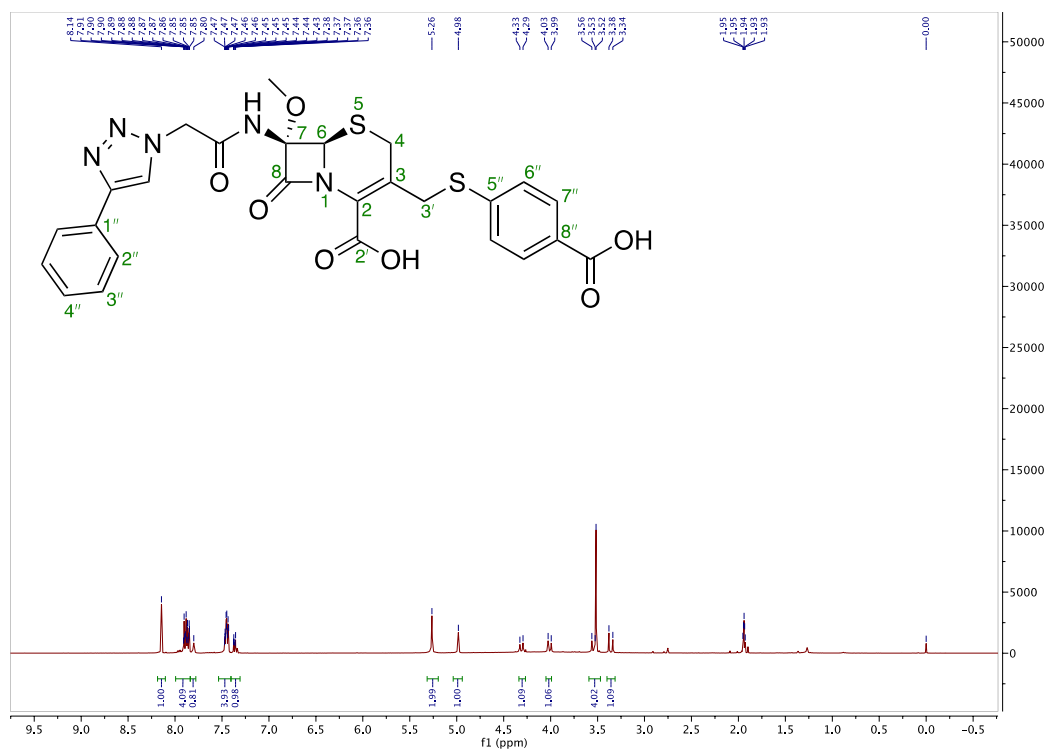

Compound **21c** ( $^1\text{H}$  NMR [400 MHz] and DEPT [101 Hz] spectra,  $\text{CD}_3\text{CN}$ )

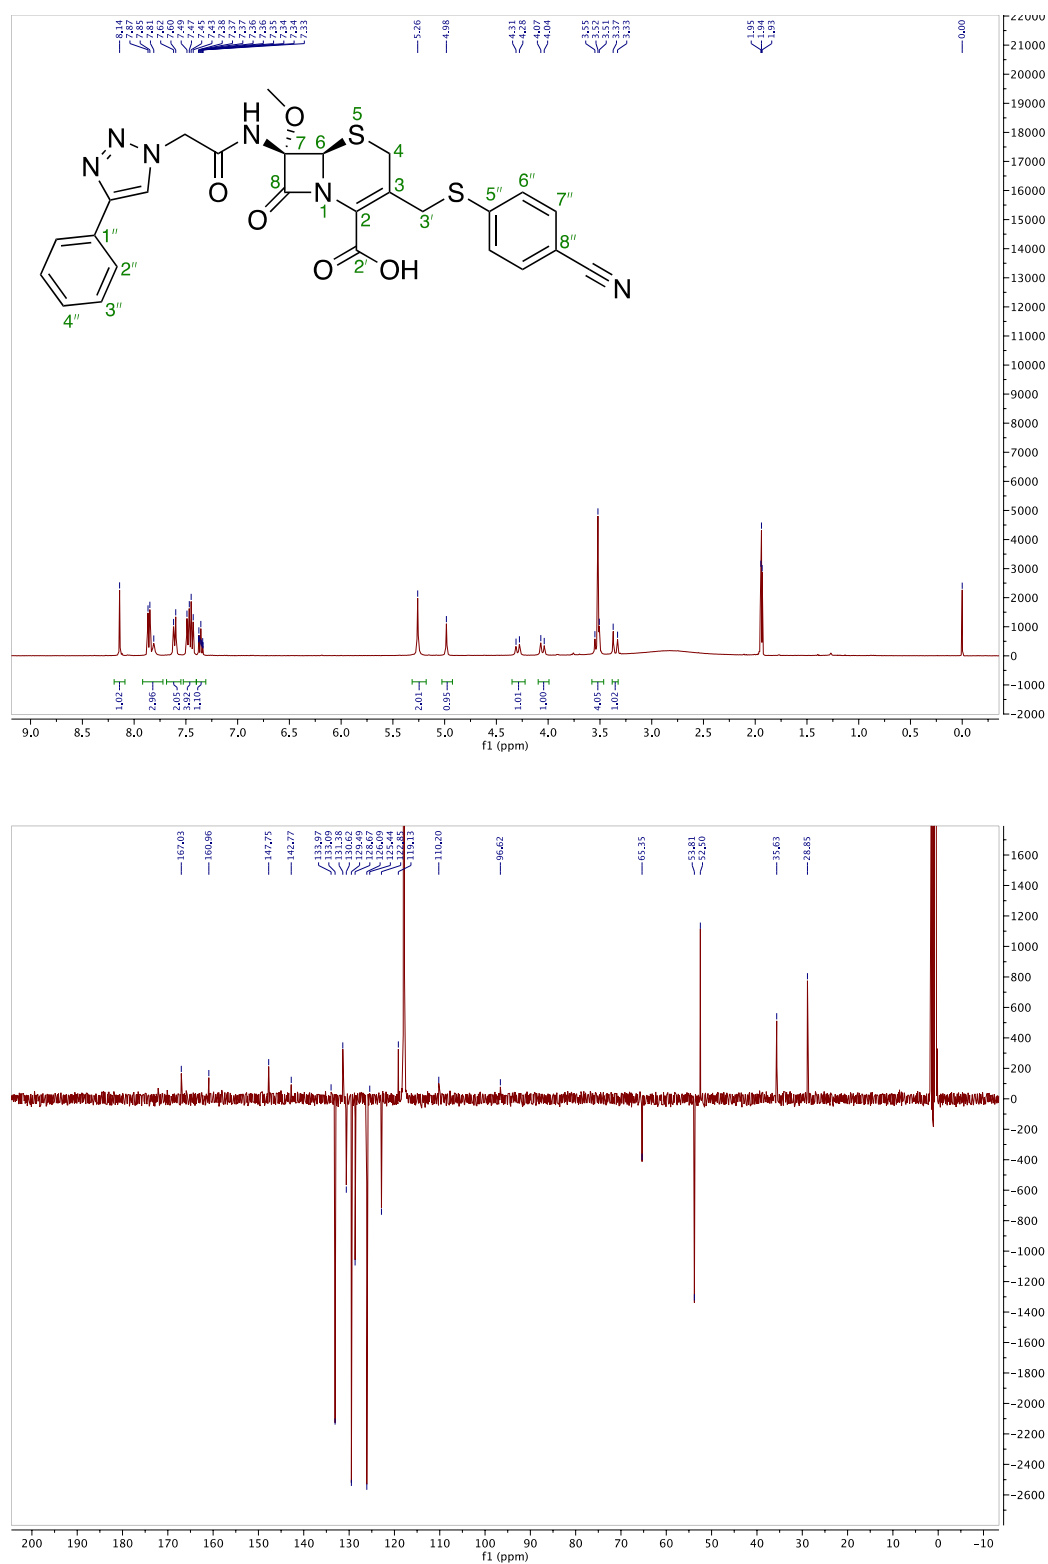



Compound **21d** ( $^1\text{H}$  NMR [400 MHz] and DEPT [101 Hz] spectra,  $\text{CD}_3\text{CN}$ )

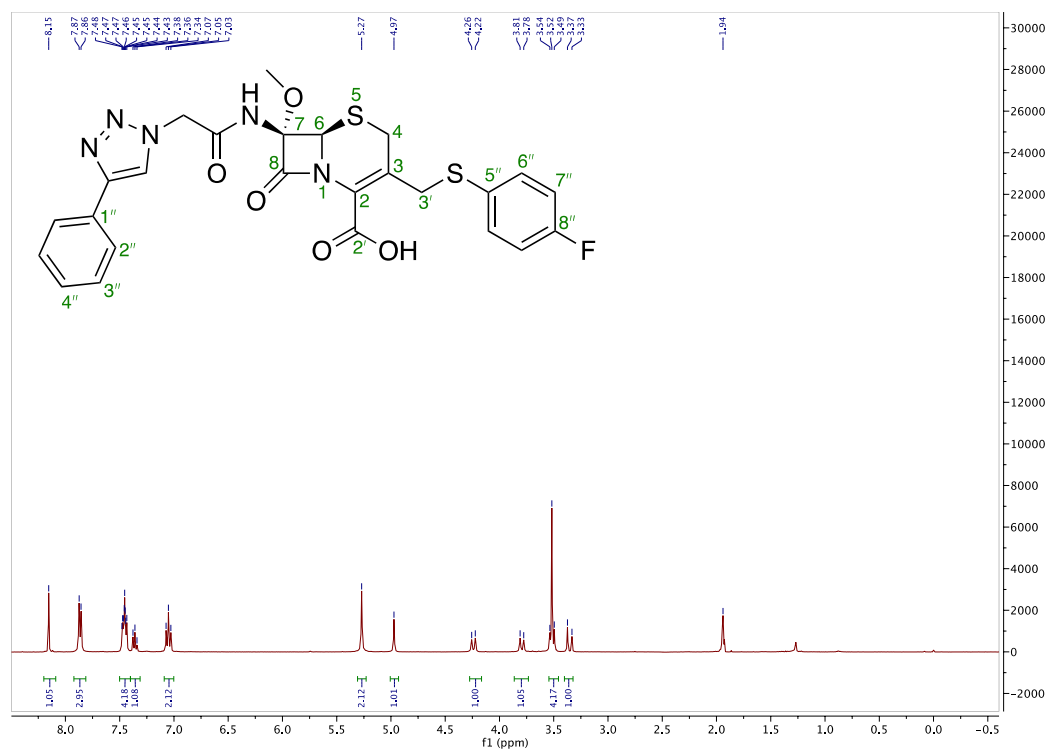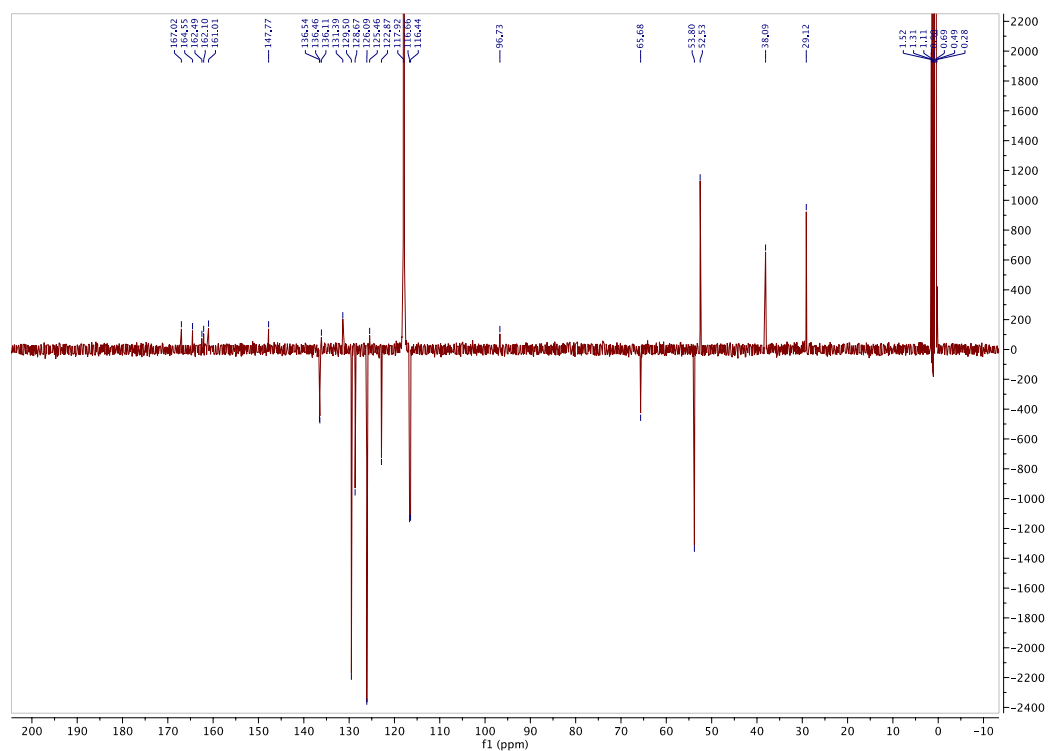

Compound **21e** ( $^1\text{H}$  NMR [400 MHz] and DEPT [101 Hz] spectra,  $\text{CD}_3\text{CN}$ )

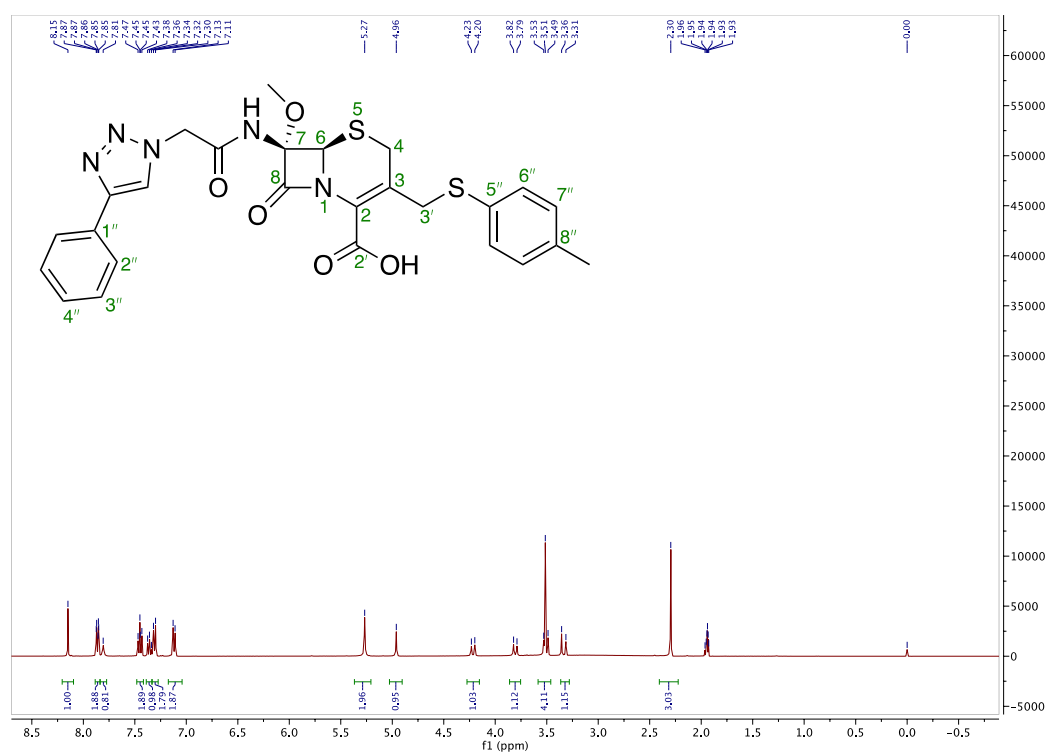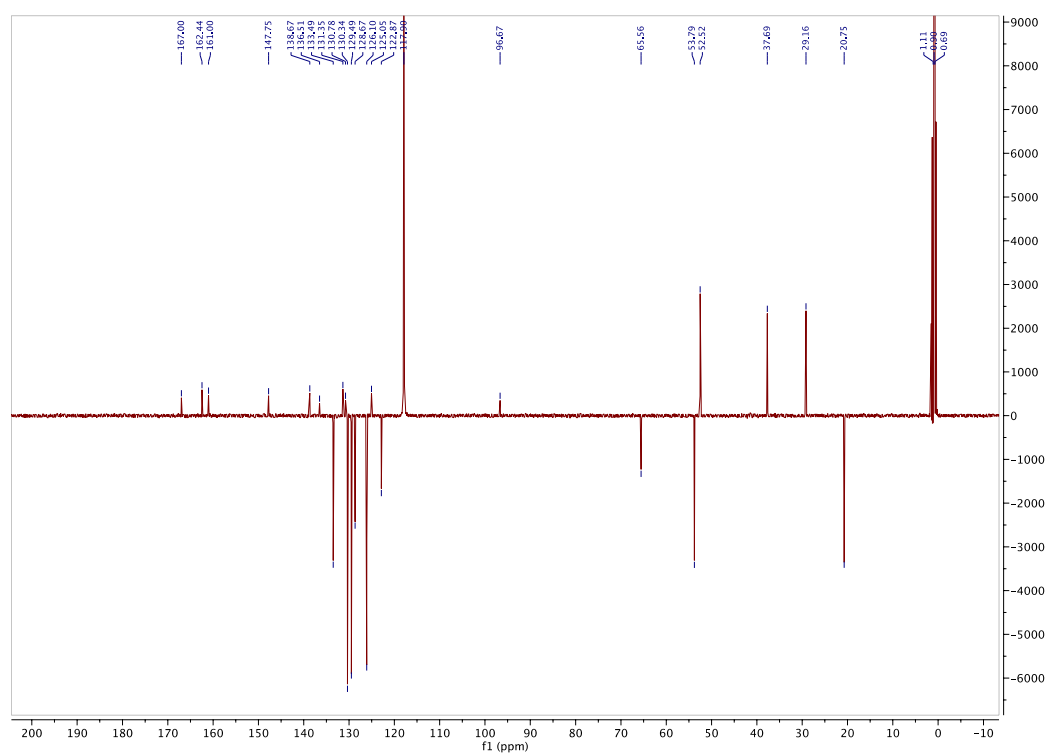

Compound **21f** ( $^1\text{H}$  NMR [400 MHz] and DEPT [101 Hz] spectra,  $\text{CD}_3\text{CN}$ )

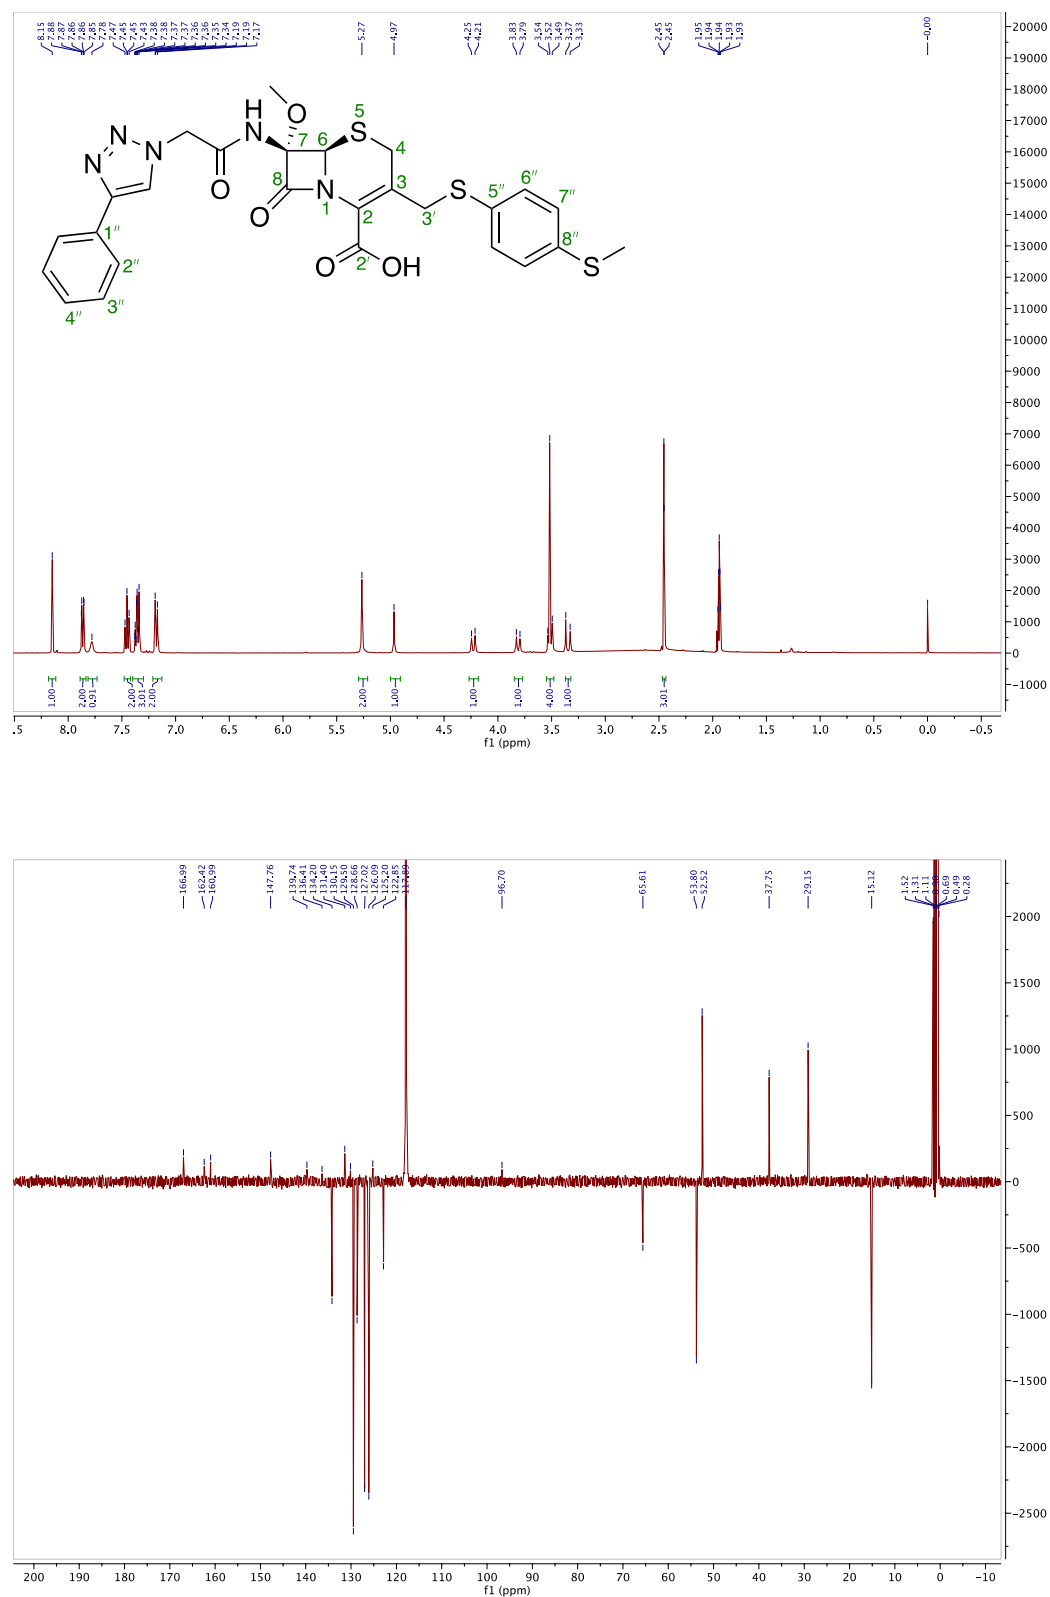

Compound **21g** ( $^1\text{H}$  NMR [400 MHz] and DEPT [101 Hz] spectra,  $\text{CD}_3\text{CN}$ )

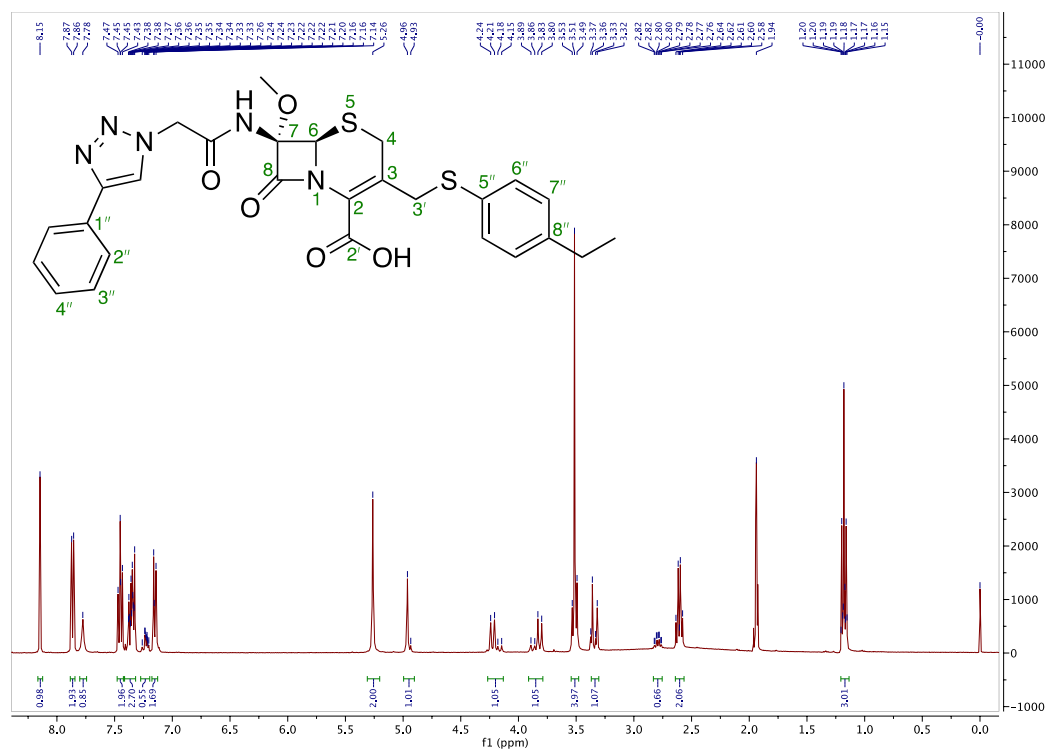

Compound **21h** ( $^1\text{H}$  NMR [400 MHz] and DEPT [101 Hz] spectra,  $\text{CD}_3\text{CN}$ )

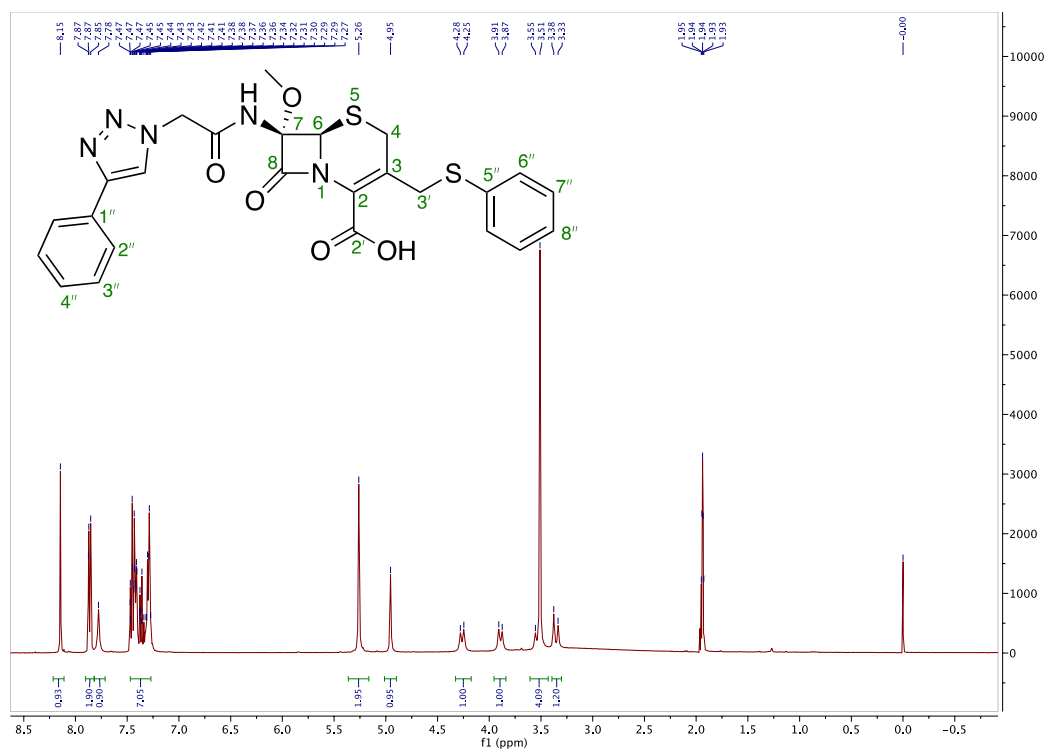

# HPLC purity traces of 21a–h

## Compound 21a

29/10/2022 11:40:41 AM Page 1 / 1

## Analysis Report

### <Sample Information>

Sample Name : ywc5-066  
Sample ID : ywc5-066  
Data Filename : ywc5-067.lcd  
Method Filename : Purity check 10min.lcm  
Batch Filename :  
Vial # : 1-1  
Injection Volume : 5 uL  
Date Acquired : 29/10/2022 11:21:56 AM  
Date Processed : 29/10/2022 11:36:51 AM

Sample Type : Unknown  
Acquired by : System Administrator  
Processed by : System Administrator

### <Chromatogram>

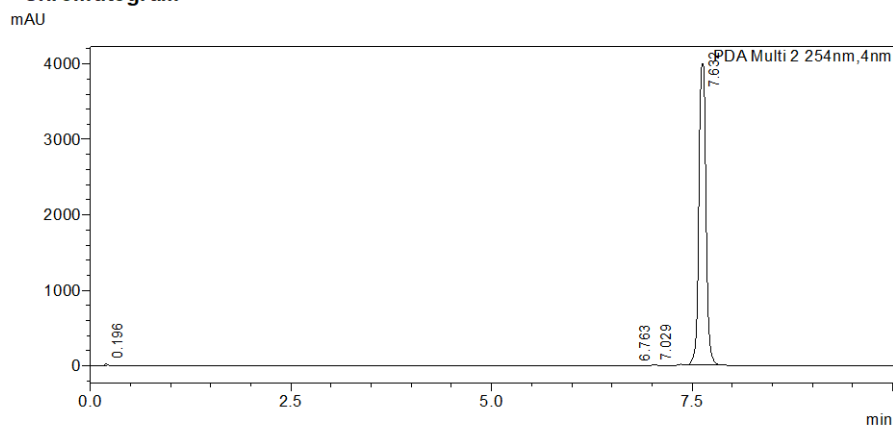

### <Peak Table>

| PDA Ch2 254nm |           |            |          |          |         |         |         |
|---------------|-----------|------------|----------|----------|---------|---------|---------|
| Peak#         | Ret. Time | Peak Start | Peak End | Area     | Height  | Area%   | Height% |
| 1             | 0.196     | 0.160      | 0.224    | 49036    | 26968   | 0.198   | 0.671   |
| 2             | 6.763     | 6.688      | 6.816    | 6550     | 1594    | 0.026   | 0.040   |
| 3             | 7.029     | 7.008      | 7.061    | 3763     | 2101    | 0.015   | 0.052   |
| 4             | 7.632     | 7.413      | 7.925    | 24733856 | 3990169 | 99.761  | 99.237  |
| Total         |           |            |          | 24793204 | 4020832 | 100.000 | 100.000 |

C:\LabSolutions\Data\Pyne\Wendy\ywc5-067.lcd

# Analysis Report

## <Sample Information>

Sample Name : ywc5-068  
Sample ID : ywc5-068  
Data Filename : ywc5-068.lcd  
Method Filename : Purity check 10min.lcm  
Batch Filename :  
Vial # : 1-1  
Injection Volume : 10 uL  
Date Acquired : 29/10/2022 11:42:33 AM  
Date Processed : 29/10/2022 11:56:48 AM  
Sample Type : Unknown  
Acquired by : System Administrator  
Processed by : System Administrator

## <Chromatogram>

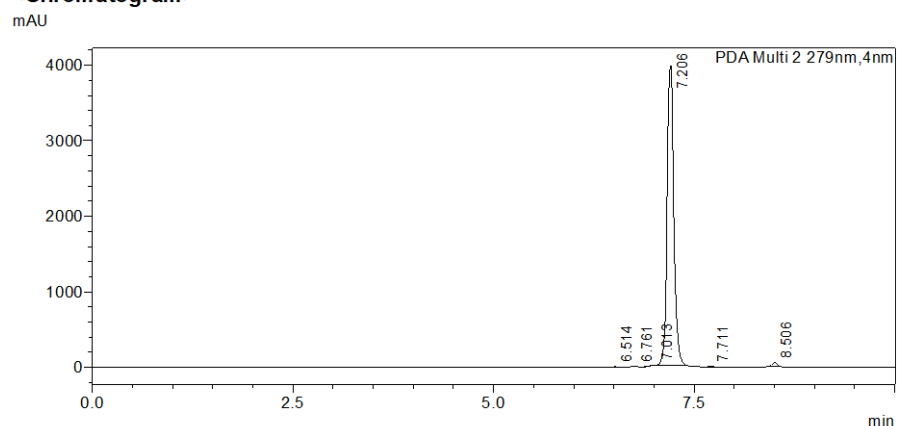

## <Peak Table>

| Peak# | Ret. Time | Peak Start | Peak End | Area     | Height  | Area%   | Height% |
|-------|-----------|------------|----------|----------|---------|---------|---------|
| 1     | 6.514     | 6.475      | 6.571    | 13316    | 4286    | 0.057   | 0.106   |
| 2     | 6.761     | 6.720      | 6.805    | 19477    | 6459    | 0.084   | 0.160   |
| 3     | 7.013     | 6.848      | 7.019    | 2294     | 479     | 0.010   | 0.012   |
| 4     | 7.206     | 7.029      | 7.413    | 22992852 | 3969711 | 98.675  | 98.266  |
| 5     | 7.711     | 7.659      | 7.765    | 26705    | 7664    | 0.115   | 0.190   |
| 6     | 8.506     | 8.416      | 8.587    | 247065   | 51160   | 1.060   | 1.266   |
| Total |           |            |          | 23301708 | 4039759 | 100.000 | 100.000 |

# Analysis Report

## <Sample Information>

Sample Name : ywc5-069  
Sample ID : ywc5-069  
Data Filename : ywc5-069.lcd  
Method Filename : Purity check 10min.lcm  
Batch Filename :  
Vial # : 1-1  
Injection Volume : 10 uL  
Date Acquired : 29/10/2022 12:00:14 PM  
Date Processed : 29/10/2022 12:10:15 PM  
Sample Type : Unknown  
Acquired by : System Administrator  
Processed by : System Administrator

## <Chromatogram>

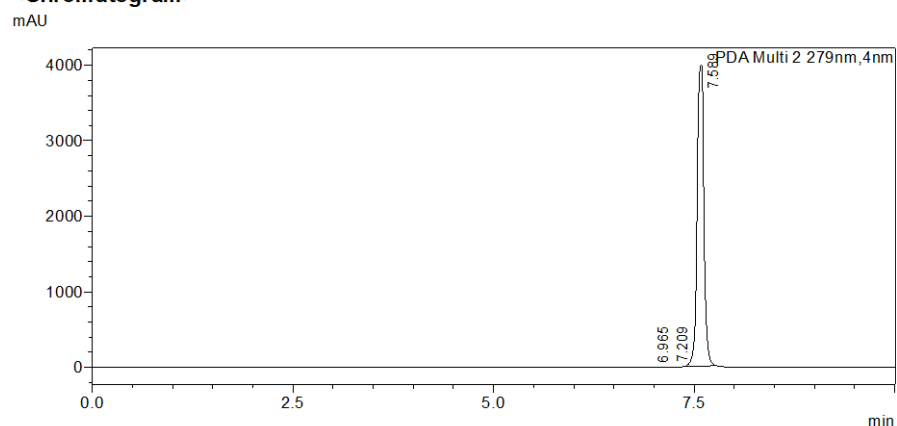

## <Peak Table>

| Peak# | Ret. Time | Peak Start | Peak End | Area     | Height  | Area%   | Height% |
|-------|-----------|------------|----------|----------|---------|---------|---------|
| 1     | 6.965     | 6.944      | 6.997    | 1912     | 1065    | 0.008   | 0.027   |
| 2     | 7.209     | 7.147      | 7.275    | 19575    | 4479    | 0.083   | 0.112   |
| 3     | 7.589     | 7.371      | 7.776    | 23485063 | 3981756 | 99.909  | 99.861  |
| Total |           |            |          | 23506550 | 3987300 | 100.000 | 100.000 |



# Analysis Report

## <Sample Information>

Sample Name : ywc5-072  
Sample ID : ywc5-072  
Data Filename : ywc5-072.lcd  
Method Filename : Purity check 10min.lcm  
Batch Filename :  
Vial # : 1-1  
Injection Volume : 5 uL  
Date Acquired : 29/10/2022 12:16:43 PM  
Date Processed : 29/10/2022 12:26:44 PM  
Sample Type : Unknown  
Acquired by : System Administrator  
Processed by : System Administrator

## <Chromatogram>

mAU

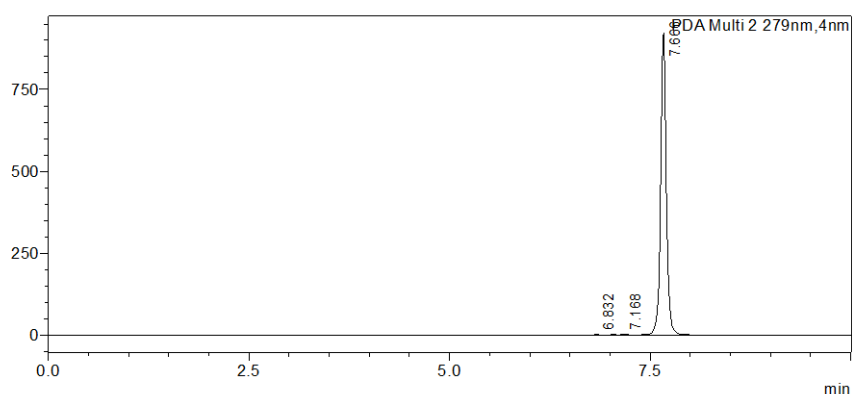

## <Peak Table>

PDA Ch2 279nm

| Peak# | Ret. Time | Peak Start | Peak End | Area    | Height | Area%   | Height% |
|-------|-----------|------------|----------|---------|--------|---------|---------|
| 1     | 6.832     | 6.773      | 6.997    | 1611    | 1498   | 0.035   | 0.162   |
| 2     | 7.168     | 6.997      | 7.317    | 14663   | 2181   | 0.323   | 0.236   |
| 3     | 7.666     | 7.381      | 8.021    | 4529855 | 920497 | 99.642  | 99.602  |
| Total |           |            |          | 4546129 | 924176 | 100.000 | 100.000 |

# Analysis Report

## <Sample Information>

Sample Name : ywc5-073  
Sample ID : ywc5-073  
Data Filename : ywc5-073.lcd  
Method Filename : Purity check 10min.lcm  
Batch Filename :  
Vial # : 1-1  
Injection Volume : 10 uL  
Date Acquired : 29/10/2022 12:33:00 PM  
Date Processed : 29/10/2022 12:43:01 PM

Sample Type : Unknown  
Acquired by : System Administrator  
Processed by : System Administrator

## <Chromatogram>

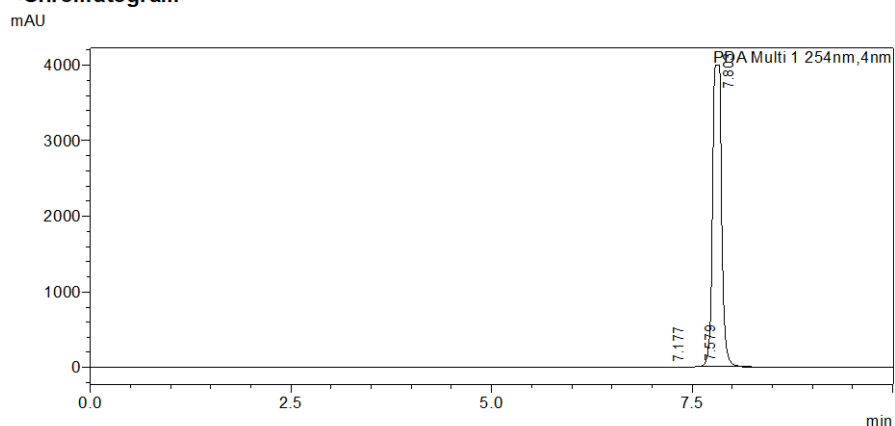

## <Peak Table>

| PDA Ch1 254nm |           |            |          |          |         |         |         |
|---------------|-----------|------------|----------|----------|---------|---------|---------|
| Peak#         | Ret. Time | Peak Start | Peak End | Area     | Height  | Area%   | Height% |
| 1             | 7.177     | 7.136      | 7.221    | 9789     | 3046    | 0.031   | 0.076   |
| 2             | 7.579     | 7.488      | 7.616    | 21860    | 6442    | 0.069   | 0.161   |
| 3             | 7.803     | 7.616      | 8.267    | 31510429 | 3982781 | 99.900  | 99.762  |
| Total         |           |            |          | 31542078 | 3992269 | 100.000 | 100.000 |

# Analysis Report

## <Sample Information>

Sample Name : ywc5-074  
Sample ID : ywc5-074  
Data Filename : ywc5-074.lcd  
Method Filename : Purity check 10min.lcm  
Batch Filename :  
Vial # : 1-1  
Injection Volume : 10 uL  
Date Acquired : 29/10/2022 12:49:12 PM  
Date Processed : 29/10/2022 12:59:13 PM

Sample Type : Unknown  
Acquired by : System Administrator  
Processed by : System Administrator

## <Chromatogram>

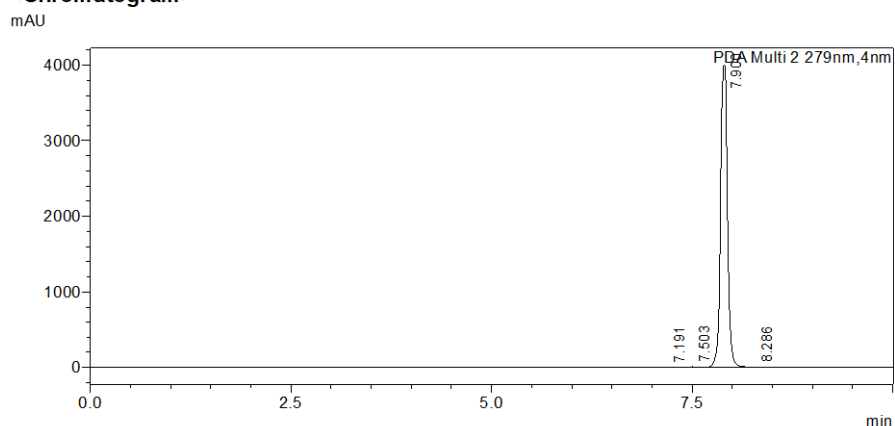

## <Peak Table>

| PDA Ch2 279nm |           |            |          |          |         |         |         |
|---------------|-----------|------------|----------|----------|---------|---------|---------|
| Peak#         | Ret. Time | Peak Start | Peak End | Area     | Height  | Area%   | Height% |
| 1             | 7.191     | 7.093      | 7.264    | 10862    | 2557    | 0.045   | 0.064   |
| 2             | 7.503     | 7.435      | 7.680    | 22170    | 5619    | 0.093   | 0.140   |
| 3             | 7.900     | 7.680      | 8.181    | 23877440 | 3992990 | 99.847  | 99.759  |
| 4             | 8.286     | 8.213      | 8.373    | 3634     | 1489    | 0.015   | 0.037   |
| Total         |           |            |          | 23914106 | 4002654 | 100.000 | 100.000 |

# Analysis Report

## <Sample Information>

Sample Name : ywc5-079  
Sample ID : ywc5-079  
Data Filename : ywc5-079.lcd  
Method Filename : Purity check 10min.lcm  
Batch Filename :  
Vial # : 1-1  
Injection Volume : 10 uL  
Date Acquired : 29/10/2022 1:21:08 PM  
Date Processed : 29/10/2022 1:31:09 PM  
Sample Type : Unknown  
Acquired by : System Administrator  
Processed by : System Administrator

## <Chromatogram>

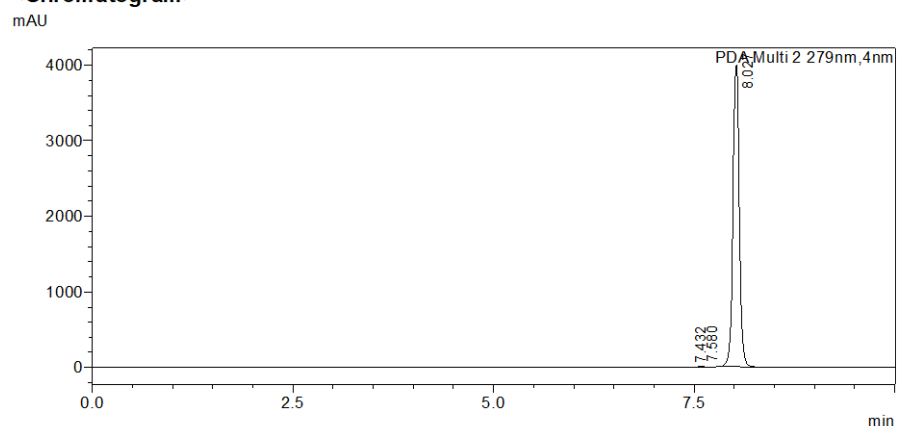

## <Peak Table>

| PDA Ch2 279nm |           |            |          |          |         |         |         |
|---------------|-----------|------------|----------|----------|---------|---------|---------|
| Peak#         | Ret. Time | Peak Start | Peak End | Area     | Height  | Area%   | Height% |
| 1             | 7.432     | 7.392      | 7.477    | 3856     | 1237    | 0.018   | 0.031   |
| 2             | 7.580     | 7.509      | 7.691    | 51738    | 9044    | 0.235   | 0.226   |
| 3             | 8.027     | 7.808      | 8.309    | 21967301 | 3986870 | 99.748  | 99.743  |
| Total         |           |            |          | 22022895 | 3997151 | 100.000 | 100.000 |

# Analysis Report

## <Sample Information>

Sample Name : ywc5-078  
Sample ID : ywc5-078  
Data Filename : ywc5-078.lcd  
Method Filename : Purity check 10min.lcm  
Batch Filename :  
Vial # : 1-1  
Injection Volume : 5 uL  
Date Acquired : 29/10/2022 1:05:06 PM  
Date Processed : 29/10/2022 1:15:07 PM  
Sample Type : Unknown  
Acquired by : System Administrator  
Processed by : System Administrator

## <Chromatogram>

mAU

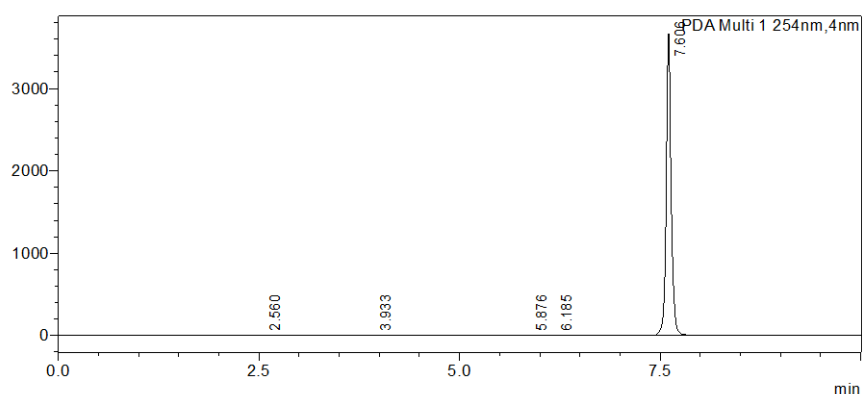

## <Peak Table>

PDA Ch1 254nm

| Peak# | Ret. Time | Peak Start | Peak End | Area     | Height  | Area%   | Height% |
|-------|-----------|------------|----------|----------|---------|---------|---------|
| 1     | 2.560     | 2.453      | 3.456    | 52209    | 897     | 0.336   | 0.024   |
| 2     | 3.933     | 3.840      | 4.064    | 304      | 40      | 0.002   | 0.001   |
| 3     | 5.876     | 5.803      | 5.941    | 444      | 99      | 0.003   | 0.003   |
| 4     | 6.185     | 6.101      | 6.197    | 92       | 28      | 0.001   | 0.001   |
| 5     | 7.606     | 7.413      | 7.861    | 15501988 | 3668536 | 99.659  | 99.971  |
| Total |           |            |          | 15555037 | 3669601 | 100.000 | 100.000 |
